# Supplementary material for: Iodine-enabled organoelectrocatalysis: enantioselective cross dehydrogenative coupling of sulfides and aldehydes
Source: Royal Society of Chemistry journal article supplement (doi:10.1039/d3gc03828a), 2024-01-01
Supplement: d3gc03828a1.pdf [file d3gc03828a1.pdf]

## Iodine-Enabled Organoelectrocatalysis: Enantioselective Cross Dehydrogenative Coupling of Sulfides and Aldehydes

Zhen Wang, Marcel Gausmann, Jan-Hendrik Dickoff and Mathias Christmann\*

\*M. Sc. Z. Wang, M. Sc. M. Gausmann, M. Sc. J. -H. Dickoff, Prof. Dr. M. Christmann Freie Universität Berlin Institute of Chemistry and Biochemistry Takustr. 3, 14195 Berlin (Germany) E-mail: [mathias.christmann@fu-berlin.de](mailto:mathias.christmann@fu-berlin.de)

### Table of Contents

|                                                                          |            |
|--------------------------------------------------------------------------|------------|
| <b>1. General information .....</b>                                      | <b>S2</b>  |
| <b>2. Optimization details .....</b>                                     | <b>S3</b>  |
| <b>3. Cyclic voltammetry studies and dynamic voltage measuring .....</b> | <b>S5</b>  |
| <b>3.1. Cyclic voltammetry studies.....</b>                              | <b>S5</b>  |
| <b>3.2. Dynamic voltage measuring.....</b>                               | <b>S7</b>  |
| <b>4. Mechanism studying experiments.....</b>                            | <b>S8</b>  |
| <b>4.1 <sup>1</sup>H NMR analysis of the reaction mixture .....</b>      | <b>S8</b>  |
| <b>4.2 Control experiments .....</b>                                     | <b>S8</b>  |
| <b>5. Unsuccessful substrates.....</b>                                   | <b>S10</b> |
| <b>6. Synthetic procedures and characterization data .....</b>           | <b>S11</b> |
| <b>7. Large-scale synthesis and mechanistic studies.....</b>             | <b>S22</b> |
| <b>8. Preparation of compounds 6a, 6b and 6c. ....</b>                   | <b>S23</b> |
| <b>9. Copies of NMR spectra .....</b>                                    | <b>S28</b> |
| <b>10. Copies of HPLC spectra.....</b>                                   | <b>S58</b> |

## 1. General information

All the electrochemical reactions were performed in an undivided cell equipped with two Pt electrodes ( $1.0 \times 1.0 \text{ cm}^2$ ) unless otherwise noted. Room temperature (rt) refers to 23 °C. Solvents such as THF, MeCN and DMF were purchased from Fischer Scientific. Products were purified by flash column chromatography on silica gel 60 M (0.040-0.063 mm, 230-400 mesh, *Macherey-Nagel*). As eluents, cyclohexane (99.5%+ quality) and EtOAc (HPLC grade) were used. Visualization of spots on TLC plate was accomplished with UV light (254 nm) or phosphomolybdic acid stain (5 g phosphomolybdic acid in 100 mL ethanol). All commercial reagents were purchased from Acros, TCI, Sigma-Aldrich. They were used without further purification unless specified.

$^1\text{H}$  NMR and  $^{13}\text{C}$  NMR spectra were recorded on Bruker Avance 700 (700 MHz), *JEOL* ECZ600 S (600 MHz), *JEOL* (ECX 400, Eclipse 500) and *Bruker* Avance 500 (500 MHz) spectrometers. All  $^1\text{H}$  NMR and  $^{13}\text{C}$  NMR chemical shifts were reported in ppm relative the corresponding residual solvent signal ( $\text{CDCl}_3$ :  $\delta_{\text{H}} = 7.26 \text{ ppm}$ ,  $\delta_{\text{C}} = 77.16 \text{ ppm}$ ). NMR yields were determined using dibromomethane as an internal standard. Reported integrals are in accordance with assignments; coupling constants ( $J$ ) are given in Hz. Multiplicity is indicated as follows: s (singlet), d (doublet), t (triplet), q (quartet), m (multiplet), dd (doublet of doublet), etc. Cyclic voltammetry was performed on an Interface 1010 B Potentiostat/Galvanostat/ZRA from *Gamry Instruments*. The measurements were performed in anhydrous and oxygen free solvents under argon atmosphere. Platinum wires were used as working-, counter-, and quasi-reference electrodes. High resolution mass spectrometry (HRMS) was performed on a *Finnigan* MA T 95 (EI), *Bruker* APEX III FTMS (ESI) or *Agilent* 6210 (ESI). Enantiomeric ratios were determined by chiral HPLC (*Agilent* Series 1200 with DAD) on a chiral column.

## 2. Optimization details

**Table S1 Screening of organocatalyst<sup>a, b</sup>**



<sup>a</sup>Reaction conditions: **1a** (0.90 mmol, 3.00 equiv.), **2a** (0.30 mmol, 1.00 equiv.), **3** (30 mol%),  $I_2$  (10 mol%),  $n-Bu_4NPF_6$  (0.2 M), MeCN (3 mL) and  $H_2O$  (10  $\mu$ L) in an undivided cell with two platinum electrodes (each  $1.0 \times 1.0$  cm<sup>2</sup>) under 2 mA at room temperature for 6 h. <sup>b</sup>Yields were determined by <sup>1</sup>H NMR analysis with  $CH_2Br_2$  as an internal standard. The product was reduced by  $NaBH_4$  to the corresponding alcohol and its enantioselectivities were determined by chiral HPLC analysis.

**Table S2 Screening of mediator<sup>a, b</sup>**



| Entry    | Mediator | Yield (%) | <i>ee</i> <sup>b</sup> (%) |
|----------|----------|-----------|----------------------------|
| <b>1</b> | $I_2$    | <b>63</b> | <b>83</b>                  |
| 2        | NaI      | 30        | 25                         |
| 3        |          | 7         | -                          |

<sup>a</sup>Reaction conditions: **1a** (0.90 mmol, 3.00 equiv.), **2a** (0.30 mmol, 1.00 equiv.), **3** (30 mol%), mediator (10 mol%),  $n-Bu_4NPF_6$  (0.2 M), MeCN (3 mL) and  $H_2O$  (10  $\mu$ L) in an undivided cell with two platinum electrodes (each  $1.0 \times 1.0$  cm<sup>2</sup>) under 2 mA at

room temperature for 6 h. <sup>b</sup>Yields were determined by <sup>1</sup>H NMR analysis with CH<sub>2</sub>Br<sub>2</sub> as an internal standard. The product was reduced by NaBH<sub>4</sub> to the corresponding alcohol and its enantioselectivities were determined by chiral HPLC analysis.

**Table S3 Screening the amount of 1a, I<sub>2</sub>, and organocatalyst<sup>a, b</sup>**



| Entry | 1a (y equiv.) | I <sub>2</sub> (x mol%) | 3a (z mol%) | Yield (%) | ee <sup>b</sup> (%) |
|-------|---------------|-------------------------|-------------|-----------|---------------------|
| 1     | 1.5           | 10                      | 30          | 45        | 81                  |
| 2     | 3             | 10                      | 30          | 63        | 83                  |
| 3     | 5             | 10                      | 30          | 66        | 83                  |
| 4     | 3             | 20                      | 30          | trace     | -                   |
| 5     | 3             | 100                     | 30          | 0         | -                   |
| 6     | 3             | 5                       | 30          | 21        | 45                  |
| 7     | 3             | 1                       | 30          | 16        | 53                  |
| 8     | 3             | 10                      | 20          | 21        | 48                  |
| 9     | 3             | 10                      | 10          | 10        | 54                  |

<sup>a</sup>Reaction conditions: 1a (y equiv.), 2a (0.30 mmol, 1.00 equiv.), 3 (z mol%), I<sub>2</sub> (x mol%), n-Bu<sub>4</sub>NPF<sub>6</sub> (0.2 M), MeCN (3 mL) and H<sub>2</sub>O (10 μL) in an undivided cell with two platinum electrodes (each 1.0 × 1.0 cm<sup>2</sup>) under 2 mA at room temperature for 6 h.

<sup>b</sup>Yields were determined by <sup>1</sup>H NMR analysis with CH<sub>2</sub>Br<sub>2</sub> as an internal standard. The product was reduced by NaBH<sub>4</sub> to the corresponding alcohol and its enantioselectivities were determined by chiral HPLC analysis.

**Table S4 Screening of current<sup>a, b</sup>**



| Entry | Current (mA) | Yield of 4a (%) | ee <sup>b</sup> (%) |
|-------|--------------|-----------------|---------------------|
| 1     | 4            | 63              | 54                  |
| 2     | 5            | 84              | 85                  |
| 3     | 6            | 52              | 74                  |
| 4     | 8            | 55              | 34                  |

<sup>a</sup>Reaction conditions: 1a (0.90 mmol, 3.00 equiv.), 2a (0.30 mmol, 1.00 equiv.), 3 (30 mol%), I<sub>2</sub> (10 mol%), n-Bu<sub>4</sub>NPF<sub>6</sub> (0.2 M), MeCN (3 mL) and H<sub>2</sub>O (10 μL) in an undivided cell with two platinum electrodes (each 1.0 × 1.0 cm<sup>2</sup>) electrolysis under the corresponding current at room temperature for 6 h. <sup>b</sup>Yields were determined by <sup>1</sup>H NMR analysis with CH<sub>2</sub>Br<sub>2</sub> as an internal standard. The product was reduced by NaBH<sub>4</sub> to the corresponding alcohol and its enantioselectivities were determined by chiral HPLC analysis.

**Table S5 Screening of solvent and electrodes<sup>a, b</sup>**



| Entry | Solvent                     | Electrodes | Yield of 4a <sup>b</sup> (%) | ee <sup>b</sup> (%) |
|-------|-----------------------------|------------|------------------------------|---------------------|
| 1     | 300:1 MeCN/H <sub>2</sub> O | Pt         | 84                           | 85                  |
| 2     | Toluene                     | Pt         | 0                            | -                   |
| 3     | DMF                         | Pt         | Trace                        | -                   |
| 4     | MeCN                        | Pt         | 86                           | 37                  |
| 5     | 400:1 MeCN/H <sub>2</sub> O | Pt         | 84                           | 75                  |
| 6     | 200:1 MeCN/H <sub>2</sub> O | Pt         | 40                           | 89                  |
| 7     | 100:1 MeCN/H <sub>2</sub> O | Pt         | 21                           | 86                  |
| 8     | 300:1 MeCN/H <sub>2</sub> O | Graphite   | 63                           | 79                  |

<sup>a</sup> Reaction conditions: **1a** (0.90 mmol, 3.00 equiv.), **2a** (0.30 mmol, 1.00 equiv.), **3** (30 mol%), I<sub>2</sub> (10 mol%), *n*-Bu<sub>4</sub>NPF<sub>6</sub> (0.2 M), solvent (HPLC level, 3 mL) in an undivided cell with two electrodes (each 1.0 × 1.0 × 0.01 cm<sup>3</sup> for platinum electrodes and each 1.0 × 1.0 × 0.3 cm<sup>3</sup> for graphite electrodes) electrolysis under 5 mA at room temperature for 6 h. <sup>b</sup> Yields were determined by <sup>1</sup>H NMR analysis with CH<sub>2</sub>Br<sub>2</sub> as an internal standard. The product was reduced by NaBH<sub>4</sub> to the corresponding alcohol and its enantioselectivities were determined by chiral HPLC analysis.

### 3. Cyclic voltammetry studies and dynamic voltage measuring

#### 3.1. Cyclic voltammetry studies

Cyclic voltammetry experiments were performed on an Interface 1010 B Potential/Galvanostat/ZRA from Gamry Instruments in anhydrous and oxygen-free MeCN under argon at room temperature. *n*-Bu<sub>4</sub>NPF<sub>6</sub> (0.05 M) was used as the supporting electrolyte. Platinum wires were used as working-, counter- and quasi-reference electrodes. The voltammograms were adjusted relative to Fc/Fc<sup>+</sup>. The scan rate was 100 mV/s.



Fig. S1. CV of ferrocene (1 mM) in MeCN with *n*-Bu<sub>4</sub>NPF<sub>6</sub> (0.05 M) as supporting electrolyte.



Fig. S2. CVs of substrates (1 mM) in MeCN with  $n\text{-Bu}_4\text{NPF}_6$  (0.05 M) as supporting electrolyte.



Fig. S3. CVs of the interaction of  $I_2$  with other substrates (50 mM) in MeCN with  $n\text{-Bu}_4\text{NPF}_6$  (0.05 M) as supporting electrolyte.



Fig. S4. CV of product **4a** (50 mM) in MeCN with  $n\text{-Bu}_4\text{NPF}_6$  (0.1 M) as supporting electrolyte. Ferrocene was added as an internal reference.

### 3.2. Dynamic voltage measuring

The experiments were performed on 2460 SourceMeter from company *Keithley* under our standard conditions.



Fig. S5. 2460 SourMeter (left) and dynamic changes of voltage during 5 h of electrolysis under the electricity of 4 mA and 5 mA, separately (right)

## 4. Mechanism studying experiments

### 4.1 <sup>1</sup>H NMR analysis of the reaction mixture



Fig. S6. Using <sup>1</sup>H NMR to monitor the variation of disulfide during the reaction. Throughout the duration of the reaction, a 50  $\mu$ L mixture was collected at different time points (from sample 1 to sample 5, 0.1 h, 1.5 h, 3 h, 4.5 h, 6 h). Sample 6 was prepared by adding 8.0 mg extra disulfide into the sample 1.

### 4.2 Control experiments

Control experiments with ArSI as the reagent: S-(4-bromophenyl)-N-(4-nitrophenyl)thiohydroxylamine was prepared according to the established method.<sup>1</sup> Anhydrous HI gas was prepared according to the literature.<sup>2</sup> And the HI gas was used directly by bubbling into the mixture. First, sulfenamide **8** was mixed with 1.5 equivalent of concentrated hydriodic acid (57 wt.% in H<sub>2</sub>O). By comparison of <sup>1</sup>H NMR spectrum, the final products were disulfide **2ii'** and 4-nitroaniline. It demonstrates the specie ArSI can be generated by the reaction of sulfenamide and hydriodic acid. Furthermore, a 10 mL round ground flask was charged with **1a** (0.90 mmol, 3.00 equiv.), **8** (0.30 mmol, 1.00 equiv.), **3a** (0.09 mmol, 15.32 mg, 30 mol%), MeCN (3 mL), H<sub>2</sub>O (10  $\mu$ L) and a proper PTFE coated stir bar. The mixture was stirred under argon for 30 minutes. There was no reaction observed by TLC monitoring. The freshly prepared anhydrous HI gas was then injected into the above mixture slowly and bubbled at a constant rate. TLC monitored the reaction until the starting material **8** consumed completely. Then the mixture was diluted with dichloromethane (3 mL). NaBH<sub>4</sub> (28.37 mg, 0.75 mmol, 5.00 equiv.) was added and the mixture was stirred at room temperature for 3 h. The reaction mixture was treated with water (2 mL) and extracted with dichloromethane (3 $\times$ 3 mL). The combined organic layers were washed with brine (3 mL), dried over Na<sub>2</sub>SO<sub>4</sub>,

filtered and the solvent was removed under reduced pressure. The crude product was purified by flash column chromatography, furnishing the desired product **5i**. (42.30 mg, yield 55%).



Fig. S7. Using <sup>1</sup>H NMR to monitor the reaction between sulfenamide and hydriodic acid. Sample **a** is 4-bromophenyl disulfide. Sample **b** is 4-bromothiophenol. Sample **c** is 4-nitroaniline. Sample **d** is *S*-(4-bromophenyl)-*N*-(4-nitrophenyl)thiohydroxylamine. Sample **e** is the mixture of sample **d** with 1.5 equivalent of hydriodic acid. Sample **f** is the result of sample **e** after standing for 5 h.



## 5. Unsuccessful substrates



### Scheme S1 Unsuccessful thiols



### Scheme S2 Unsuccessful aldehydes and byproducts

## 6. Synthetic procedures and characterization data



Fig. S8 Reaction setup  $\alpha$ -sulfenylation of aldehydes (left) using a platinum electrode arrangement (right).

An 18 mL tube (diameter: 13 mm) was charged with **1** (0.90 mmol, 3.00 equiv.), **2** (0.30 mmol, 1.00 equiv.),  $\text{I}_2$  (7.61 mg, 10 mol%), **3a** (15.30 mg, 30 mol%),  $n\text{-Bu}_4\text{NPF}_6$  (232.0 mg, 0.2 M), MeCN (3 mL),  $\text{H}_2\text{O}$  (10  $\mu\text{L}$ ) and a proper PTFE coated stir bar. The tube was sealed with a septum equipped with two Pt electrodes ( $1 \times 1 \text{ cm}^2$ , approx. 5 mm interelectrode gap) and the reaction mixture was electrolyzed under a constant current of 5 mA for 6 h. Then the mixture was diluted with MeCN (2 mL).  $\text{NaBH}_4$  (56.75 mg, 1.50 mmol, 5.00 equiv.) was added and the mixture was stirred at room temperature for 3 h. TLC monitored the reaction until it completed. The reaction mixture was treated with water (20 mL) and extracted with dichloromethane ( $3 \times 20 \text{ mL}$ ). The combined organic layers were washed with brine (10 mL), dried over  $\text{Na}_2\text{SO}_4$ , filtered and the solvent was removed under reduced pressure. The crude product was purified by flash column chromatography, furnishing the desired product **5**.

**(R)-3-phenyl-2-(p-tolylthio)propan-1-ol (5a)**



Purification: flash column chromatography (cyclohexane/EtOAc = 10:1,  $R_f$  = 0.2). Colorless liquid (62.10 mg, 80%). The enantiomeric excess (86% *ee*) was determined by HPLC with a *Diacel* Chiralpak IA column (*i*-PrOH/hexane = 3:97, 38 bar, flow rate: 1.0 mL/min,  $\lambda_{\max}$  = 254 nm):  $t_r$ (major) = 18.03 min.  $t_r$ (minor) = 15.97 min.  $[\alpha]_D^{24}$  = - 0.63 (c = 0.59, CHCl<sub>3</sub>).

<sup>1</sup>H NMR (600 MHz, CDCl<sub>3</sub>)  $\delta$  7.37 – 7.32 (m, 4H), 7.29 – 7.25 (m, 3H), 7.14 (d,  $J$  = 7.9 Hz, 2H), 3.64 (dt,  $J$  = 10.6 Hz, 5.2 Hz, 1H), 3.56 (dt,  $J$  = 11.4, 5.7 Hz, 1H), 3.44 – 3.38 (m, 1H), 2.99 – 2.86 (m, 2H), 2.55 (t,  $J$  = 6.2 Hz, 1H), 2.37 (s, 3H). <sup>13</sup>C NMR (151 MHz, CDCl<sub>3</sub>)  $\delta$  138.8, 137.8, 133.5, 129.9, 129.5, 129.2, 128.5, 126.5, 62.5, 53.9, 37.6, 21.1.

HRMS (ESI, *m/z*) calcd. for C<sub>16</sub>H<sub>18</sub>NaOS<sup>+</sup> [M+Na]<sup>+</sup>: 281.0971, found: 281.0972.

**(R)-2-((4-isopropylphenyl)thio)-3-phenylpropan-1-ol (5b)**



Purification: flash column chromatography (cyclohexane/EtOAc = 10:1,  $R_f$  = 0.22). Colorless liquid (39.60 mg, 47%). The enantiomeric excess (91% *ee*) was determined by HPLC with a *Diacel* Chiralpak IA column (EtOAc/hexane = 1:4, 31 bar, flow rate: 0.8 mL/min,  $\lambda_{\max}$  = 254 nm):  $t_r$ (major) = 9.74 min.  $t_r$ (minor) = 8.64 min.  $[\alpha]_D^{24}$  = 0.26 (c = 3.68, CHCl<sub>3</sub>).

<sup>1</sup>H NMR (600 MHz, CDCl<sub>3</sub>)  $\delta$  7.36 – 7.34 (m, 2H), 7.33 – 7.29 (m, 2H), 7.25 – 7.22 (m, 3H), 7.18 – 7.15 (m, 2H), 3.61 (dd,  $J$  = 11.5, 4.4 Hz, 1H), 3.51 (dd,  $J$  = 11.5, 5.7 Hz, 1H), 3.39 (dddd,  $J$  = 8.3, 6.6, 5.7, 4.3 Hz, 1H), 2.98 – 2.87 (m, 3H), 2.25 (s, 1H), 1.25 (s, 3H), 1.24 (s, 3H). <sup>13</sup>C NMR (151 MHz, CDCl<sub>3</sub>)  $\delta$  148.9, 138.8, 133.5, 129.9, 129.3, 128.6, 127.4, 126.7, 62.6, 54.1, 37.8, 33.8, 24.0.

HRMS (ESI, *m/z*) calcd. for C<sub>18</sub>H<sub>22</sub>NaOS<sup>+</sup> [M+Na]<sup>+</sup>: 309.1284, found: 309.1287.

**(R)-2-((4-(tert-butyl)phenyl)thio)-3-phenylpropan-1-ol (5c)**



Purification: flash column chromatography (cyclohexane/EtOAc = 10:1,  $R_f$  = 0.21). Colorless liquid (37.90 mg, 42%). The enantiomeric excess (73% *ee*) was determined by HPLC with a *Diacel* Chiralpak IA column (*i*-PrOH/hexane = 1:49, 37 bar, flow rate: 1.0 mL/min,  $\lambda_{\max}$  = 254 nm):  $t_r$ (major) = 16.00 min.  $t_r$ (minor) = 13.67 min.  $[\alpha]_D^{24}$  = -0.66 (c = 0.64, CHCl<sub>3</sub>).

<sup>1</sup>H NMR (600 MHz, CDCl<sub>3</sub>)  $\delta$  7.35 – 7.33 (m, 2H), 7.32 – 7.28 (m, 4H), 7.25 – 7.21 (m, 3H), 3.60 (dd,  $J$  = 11.6, 4.3 Hz, 1H), 3.50 (dd,  $J$  = 11.6, 5.8 Hz, 1H), 3.39 (dddd,  $J$  = 8.4, 6.6, 5.8, 4.4 Hz, 1H), 2.96 (dd,  $J$  = 13.8, 6.6 Hz, 1H), 2.90 (dd,  $J$  = 13.8, 8.3 Hz, 1H), 2.16 (s, 1H), 1.31 (s, 9H). <sup>13</sup>C NMR (151 MHz, CDCl<sub>3</sub>)  $\delta$  151.2, 138.9, 133.2, 129.7, 129.4, 128.6, 126.7, 126.3, 62.6, 54.0, 37.9, 34.7, 31.4.

HRMS (ESI, *m/z*) calcd. for C<sub>19</sub>H<sub>24</sub>NaOS<sup>+</sup> [M+Na]<sup>+</sup>: 323.1440, found: 323.1445.

### (*R*)-2-((4-methoxyphenyl)thio)-3-phenylpropan-1-ol (5d)



Purification: flash column chromatography (cyclohexane/EtOAc = 10:1,  $R_f$  = 0.18). Colorless liquid (66.30 mg, 78%). The enantiomeric excess (91% *ee*) was determined by HPLC with a *Diacel* Chiralpak IA column (EtOAc/hexane = 1:4, 38 bar, flow rate: 1.0 mL/min,  $\lambda_{\max}$  = 254 nm):  $t_r$ (major) = 17.43 min.  $t_r$ (minor) = 13.05 min.  $[\alpha]_D^{24}$  = 3.17 (c = 0.54, CHCl<sub>3</sub>).

<sup>1</sup>H NMR (600 MHz, CDCl<sub>3</sub>)  $\delta$  7.38 – 7.35 (m, 2H), 7.31 – 7.28 (m, 2H), 7.24 – 7.19 (m, 3H), 6.86 – 6.83 (m, 2H), 3.80 (s, 3H), 3.56 (dd,  $J$  = 11.6, 4.2 Hz, 1H), 3.45 (dd,  $J$  = 11.6, 6.0 Hz, 1H), 3.28 – 3.23 (m, 1H), 2.92 (dd,  $J$  = 14.0, 6.6 Hz, 1H), 2.84 (dd,  $J$  = 14.0, 8.4 Hz, 1H). <sup>13</sup>C NMR (151 MHz, CDCl<sub>3</sub>)  $\delta$  160.0, 138.9, 136.3, 129.3, 128.6, 126.7, 123.1, 114.8, 62.4, 55.5, 54.8, 37.8.

HRMS (ESI, *m/z*) calcd. for C<sub>16</sub>H<sub>18</sub>NaO<sub>2</sub>S<sup>+</sup> [M+Na]<sup>+</sup>: 297.0920, found: 297.0934.

### (*R*)-2-((3,4-dimethylphenyl)thio)-3-phenylpropan-1-ol (5e)



Purification: flash column chromatography (cyclohexane/EtOAc = 10:1,  $R_f$  = 0.18). Colorless liquid (64.70 mg, 79%). The enantiomeric excess (91% *ee*) was determined by HPLC with a *Diacel* Chiralpak IA column (EtOAc/hexane = 1:4, 31 bar, flow rate: 0.8 mL/min,  $\lambda_{\max}$  = 254 nm):  $t_r$ (major) = 9.15 min.  $t_r$ (minor) = 11.36 min.  $[\alpha]_D^{25}$  = -1.10 (c = 1.61, CHCl<sub>3</sub>).

<sup>1</sup>H NMR (500 MHz, CDCl<sub>3</sub>)  $\delta$  7.32 – 7.29 (m, 2H), 7.25 – 7.22 (m, 3H), 7.20 – 7.16 (m, 2H), 7.07 (d,  $J$  = 7.7 Hz, 1H), 3.60 (dd,  $J$  = 11.5, 4.4 Hz, 1H), 3.50 (dd,  $J$  = 11.5, 5.7 Hz, 1H), 3.37 (dddd,  $J$  = 8.3, 6.6, 5.7, 4.4 Hz, 1H), 2.96 (dd,  $J$  = 13.9, 6.6 Hz, 1H), 2.90 (dd,  $J$  = 13.9, 8.3 Hz,

1H), 2.25 (s, 3H), 2.24 (s, 3H). <sup>13</sup>C NMR (126 MHz, CDCl<sub>3</sub>) δ 138.9, 137.6, 136.8, 134.8, 131.1, 130.4, 129.7, 129.4, 128.6, 126.7, 62.6, 54.2, 37.9, 19.8, 19.5.

HRMS (ESI, m/z) calcd. for C<sub>17</sub>H<sub>20</sub>NaOS<sup>+</sup> [M+Na]<sup>+</sup>: 295.1127, found: 295.1135.

#### (R)-3-phenyl-2-(phenylthio)propan-1-ol (5f)



Purification: flash column chromatography (cyclohexane/EtOAc = 10:1, **R<sub>f</sub>** = 0.18). Colorless liquid (50.59 mg, 65%). The enantiomeric excess (86% *ee*) was determined by HPLC with a *Diacel* Chiralpak IA column (EtOAc/hexane = 1:4, 37 bar, flow rate: 1.0 mL/min, λ<sub>max</sub> = 254 nm): t<sub>r</sub>(major) = 11.42 min. t<sub>r</sub>(minor) = 9.38 min. [α]<sub>D</sub><sup>24</sup> = -8.53 (c = 0.10, CHCl<sub>3</sub>).

<sup>1</sup>H NMR (600 MHz, CDCl<sub>3</sub>) δ 7.42 – 7.39 (m, 2H), 7.32 – 7.26 (m, 5H), 7.25 – 7.22 (m, 3H), 3.62 (dd, *J* = 11.5, 4.3 Hz, 1H), 3.53 (dd, *J* = 11.5, 5.6 Hz, 1H), 3.46 – 3.41 (m, 1H), 2.98 – 2.90 (m, 2H), 1.58 (s, 1H). <sup>13</sup>C NMR (151 MHz, CDCl<sub>3</sub>) δ 138.7, 133.5, 133.0, 129.4, 129.2, 128.6, 127.8, 126.8, 62.7, 53.9, 37.9.

HRMS (ESI, m/z) calcd. for C<sub>15</sub>H<sub>16</sub>NaOS<sup>+</sup> [M+Na]<sup>+</sup>: 267.0814, found: 267.0807.

#### (R)-2-((4-fluorophenyl)thio)-3-phenylpropan-1-ol (5g)



Purification: flash column chromatography (cyclohexane/EtOAc = 10:1, **R<sub>f</sub>** = 0.12). Colorless liquid (59.32 mg, 75%). The enantiomeric excess (82% *ee*) was determined by HPLC with a *Diacel* Chiralpak IA column (EtOAc/hexane = 1:4, 38 bar, flow rate: 1.0 mL/min, λ<sub>max</sub> = 254 nm): t<sub>r</sub>(major) = 11.91 min. t<sub>r</sub>(minor) = 8.73 min. [α]<sub>D</sub><sup>25</sup> = -1.65 (c = 0.48, CHCl<sub>3</sub>).

<sup>1</sup>H NMR (600 MHz, CDCl<sub>3</sub>) δ 7.41 – 7.36 (m, 2H), 7.32 – 7.28 (m, 2H), 7.25 – 7.19 (m, 3H), 7.02 – 6.96 (m, 2H), 3.60 (dd, *J* = 11.6, 4.4 Hz, 1H), 3.51 (dd, *J* = 11.6, 5.9 Hz, 1H), 3.32 (tdd, *J* = 7.4, 5.9, 4.4 Hz, 1H), 2.91 (d, *J* = 7.4 Hz, 2H), 1.68 (s, 1H). <sup>13</sup>C NMR (151 MHz, CDCl<sub>3</sub>) δ 162.8 (d, *J* = 248.5 Hz), 138.6, 135.8 (d, *J* = 8.1 Hz), 129.3, 128.7, 128.4 (d, *J* = 4.1 Hz), 126.8, 116.3 (d, *J* = 21.8 Hz), 62.7, 54.8, 37.9. <sup>19</sup>F NMR (376 MHz, CDCl<sub>3</sub>) δ -113.14.

HRMS (ESI, m/z) calcd. for C<sub>15</sub>H<sub>15</sub>FNiOS<sup>+</sup> [M+Na]<sup>+</sup>: 285.0720, found: 285.0720.

#### (R)-2-((4-chlorophenyl)thio)-3-phenylpropan-1-ol (5h)



Purification: flash column chromatography (cyclohexane/EtOAc = 10:1,  $R_f$  = 0.2). Colorless oil (40.36 mg, 48%). The enantiomeric excess (87% *ee*) was determined by HPLC with a *Diacel* Chiralpak IA column (EtOAc/hexane = 1:4, 38 bar, flow rate: 1.0 mL/min,  $\lambda_{\max}$  = 254 nm):  $t_r$ (major) = 13.86 min.  $t_r$ (minor) = 8.82 min.  $[\alpha]_D^{24}$  = 16.64 (c = 0.22, CHCl<sub>3</sub>).

<sup>1</sup>H NMR (600 MHz, CDCl<sub>3</sub>)  $\delta$  7.32 – 7.28 (m, 4H), 7.26 – 7.23 (m, 3H), 7.22 – 7.20 (m, 2H), 3.63 (dd,  $J$  = 11.6, 4.4 Hz, 1H), 3.53 (dd,  $J$  = 11.6, 5.7 Hz, 1H), 3.44 – 3.34 (m, 1H), 2.96 – 2.89 (m, 2H), 2.15 (s, 1H). <sup>13</sup>C NMR (151 MHz, CDCl<sub>3</sub>)  $\delta$  138.5, 134.1, 133.9, 132.2, 129.34, 129.32, 128.7, 126.8, 62.8, 54.2, 37.8.

HRMS (ESI, *m/z*) calcd. for C<sub>15</sub>H<sub>15</sub>ClNaOS<sup>+</sup> [M+Na]<sup>+</sup>: 301.0424, found: 301.0415.

**(*R*)-2-((4-bromophenyl)thio)-3-phenylpropan-1-ol (5i)**



Purification: flash column chromatography (cyclohexane/EtOAc = 10:1,  $R_f$  = 0.2). Colorless liquid (82.01 mg, 84%). The enantiomeric excess (74% *ee*) was determined by HPLC with a *Diacel* Chiralpak IA column (*i*-PrOH/Hexane = 1:19, 38 bar, flow rate: 1.0 mL/min,  $\lambda_{\max}$  = 254 nm):  $t_r$ (major) = 15.45 min.  $t_r$ (minor) = 12.92 min.  $[\alpha]_D^{24}$  = -5.83 (c = 2.13, CHCl<sub>3</sub>).

<sup>1</sup>H NMR (500 MHz, CDCl<sub>3</sub>)  $\delta$  7.42 – 7.41 (m, 1H), 7.40 – 7.39 (m, 1H), 7.33 – 7.29 (m, 2H), 7.26 – 7.20 (m, 5H), 3.68 – 3.60 (m, 1H), 3.57 – 3.51 (m, 1H), 3.44 – 3.37 (m, 1H), 2.99 – 2.88 (m, 2H), 2.14 (t,  $J$  = 5.8 Hz, 1H). <sup>13</sup>C NMR (126 MHz, CDCl<sub>3</sub>)  $\delta$  138.4, 134.3, 132.9, 132.3, 129.3, 128.7, 126.8, 121.9, 62.8, 54.1, 37.8.

HRMS (ESI, *m/z*) calcd. for C<sub>15</sub>H<sub>15</sub>BrNaOS<sup>+</sup> [M+Na]<sup>+</sup>: 344.9919, found: 344.9931.

**(*R*)-2-((3,5-bis(trifluoromethyl)phenyl)thio)-3-phenylpropan-1-ol (5j)**



Purification: flash column chromatography (cyclohexane/EtOAc = 20:1,  $R_f$  = 0.1). Colorless liquid (59.20 mg, 52%). The enantiomeric excess (61% *ee*) was determined by HPLC with a *Diacel* Chiralpak IC column (EtOH/hexane = 1:99, 41bar, flow rate: 1.0 mL/min,  $\lambda_{\max}$  = 254nm):  $t_r$ (major) = 6.34 min.  $t_r$ (minor) = 6.67 min.  $[\alpha]_D^{25}$  = -7.92 (c = 0.96, CHCl<sub>3</sub>).

<sup>1</sup>H NMR (600 MHz, CDCl<sub>3</sub>)  $\delta$  7.66 (s, 3H), 7.32 – 7.28 (m, 2H), 7.25 – 7.21 (m, 3H), 3.83 – 3.74 (m, 1H), 3.74 – 3.65 (m, 1H), 3.58 – 3.54 (m, 1H), 3.10 (dd,  $J$  = 14.0, 7.0 Hz, 1H), 2.91 (dd,  $J$  = 14.0, 8.0 Hz, 1H), 2.03 (s, 1H). <sup>13</sup>C NMR (151 MHz, CDCl<sub>3</sub>)  $\delta$  138.8, 137.8, 132.3 (q,  $J$  = 33.5 Hz), 130.66 (d,  $J$  = 4.2 Hz), 129.4, 128.8, 127.2, 123.04 (q,  $J$  = 273.2 Hz) 120.58 (p,  $J$  = 3.9 Hz), 63.8, 54.3, 38.2. <sup>19</sup>F NMR (565 MHz, CDCl<sub>3</sub>)  $\delta$  -62.91.

HRMS (ESI, *m/z*) calcd. for C<sub>17</sub>H<sub>14</sub>F<sub>6</sub>NaOS<sup>+</sup> [M+Na]<sup>+</sup>: 403.0562, found: 403.0586.

**(*R*)-3-phenyl-2-(propylthio)propan-1-ol (5k)**



Purification: flash column chromatography (cyclohexane/EtOAc = 15:1,  $R_f$  = 0.2). Colorless liquid (34.32 mg, 54%). The enantiomeric excess (enantiopure, >99% *ee*) was determined by HPLC with a *Diacel* Chiralpak IA column (EtOH/hexane = 1:99, 39 bar, flow rate: 1.0 mL/min,  $\lambda_{\max}$  = 254 nm):  $t_r$ (major) = 11.77 min.  $t_r$ (minor) = 12.89 min.  $[\alpha]_D^{25}$  = 15.70 (c = 0.47, CHCl<sub>3</sub>). <sup>1</sup>H NMR (600 MHz, CDCl<sub>3</sub>)  $\delta$  7.32 – 7.29 (m, 2H), 7.25 – 7.21 (m, 3H), 3.65 (ddd,  $J$  = 11.2, 6.6, 4.3 Hz, 1H), 3.53 – 3.43 (m, 1H), 2.99 (tdd,  $J$  = 7.4, 6.2, 4.2 Hz, 1H), 2.94 – 2.81 (m, 2H), 2.49 – 2.39 (m, 2H), 2.26 (t,  $J$  = 6.2 Hz, 1H), 1.59 – 1.53 (m, 2H), 0.95 (t,  $J$  = 7.4 Hz, 3H). <sup>13</sup>C NMR (151 MHz, CDCl<sub>3</sub>)  $\delta$  139.1, 129.4, 128.6, 126.6, 62.8, 50.9, 38.7, 32.9, 23.3, 13.6. HRMS (ESI, *m/z*) calcd. for C<sub>12</sub>H<sub>18</sub>NaOS<sup>+</sup> [M+Na]<sup>+</sup>: 233.0971, found:233.0990.

**(*R*)-2-(phenethylthio)-3-phenylpropan-1-ol (5l)**



Purification: flash column chromatography (cyclohexane/EtOAc = 15:1,  $R_f$  = 0.18). Colorless liquid (15.62 mg, 20%). The enantiomeric excess (91% *ee*) was determined by HPLC with a *Diacel* Chiralpak IA column (EtOH/hexane = 1:99, 39 bar, flow rate: 1.0 mL/min,  $\lambda_{\max}$  = 254 nm):  $t_r$ (major) = 16.41 min.  $t_r$ (minor) = 17.19 min.  $[\alpha]_D^{25}$  = 11.44 (c = 0.32, CHCl<sub>3</sub>). <sup>1</sup>H NMR (600 MHz, CDCl<sub>3</sub>)  $\delta$  7.32 – 7.27 (m, 4H), 7.26 – 7.19 (m, 4H), 7.19 – 7.11 (m, 2H), 3.64 (dd,  $J$  = 11.6, 4.2 Hz, 1H), 3.47 (dd,  $J$  = 11.6, 6.2 Hz, 1H), 3.01 – 2.96 (m, 1H), 2.89 (dd,  $J$  = 13.8, 7.6 Hz, 1H), 2.88 – 2.77 (m, 3H), 2.75 – 2.68 (m, 2H), 2.17 (s, 1H). <sup>13</sup>C NMR (151 MHz, CDCl<sub>3</sub>)  $\delta$  140.3, 139.0, 129.4, 128.645, 128.635, 128.59, 126.69, 128.61, 63.0, 51.2, 38.6, 36.5, 32.4. HRMS (ESI, *m/z*) calcd. for C<sub>17</sub>H<sub>20</sub>NaOS<sup>+</sup> [M+Na]<sup>+</sup>: 295.1127, found: 295.1152.

**(*R*)-3-phenyl-2-(thiophen-2-ylthio)propan-1-ol (5m)**



Purification: flash column chromatography (cyclohexane/EtOAc = 15:1,  $R_f$  = 0.12). Colorless liquid (56.60 mg, 76%). The enantiomeric excess (89% *ee*) was determined by HPLC with a *Diacel* Chiralpak IA column (*i*-PrOH/hexane = 3:97, 44 bar, flow rate: 1.0 mL/min,  $\lambda_{\max}$  = 254 nm):  $t_r$ (major) = 16.18 min.  $t_r$ (minor) = 19.51 min.  $[\alpha]_D^{24}$  = 4.4 (c = 0.25, CHCl<sub>3</sub>).

**<sup>1</sup>H NMR** (500 MHz, CDCl<sub>3</sub>) δ 7.45 (dd, *J* = 5.4, 1.2 Hz, 1H), 7.38 – 7.34 (m, 2H), 7.31 – 7.25 (m, 3H), 7.19 (dd, *J* = 3.6, 1.2 Hz, 1H), 7.06 (dd, *J* = 5.4, 3.6 Hz, 1H), 3.70 – 3.65 (m, 1H), 3.60 – 3.55 (m, 1H), 3.26 (dtd, *J* = 8.2, 6.4, 4.4 Hz, 1H), 3.00 (dd, *J* = 14.0, 6.8 Hz, 1H), 2.91 (dd, *J* = 14.0, 8.2 Hz, 1H), 2.26 (d, *J* = 6.0 Hz, 1H). **<sup>13</sup>C NMR** (151 MHz, CDCl<sub>3</sub>) δ 138.5, 136.1, 130.7, 130.5, 129.3, 128.6, 127.9, 126.7, 62.4, 55.9, 37.4.

**HRMS (ESI, *m/z*)** calcd. for C<sub>13</sub>H<sub>14</sub>NaOS<sub>2</sub><sup>+</sup> [*M*+Na]<sup>+</sup>: 273.0378, found: 273.0381.

**(*R*)-3-(4-methoxyphenyl)-2-(*p*-tolylthio)propan-1-ol (5n)**



Purification: flash column chromatography (cyclohexane/EtOAc = 20:1, *R<sub>f</sub>* = 0.13). Colorless liquid (38.72 mg, 45%). The enantiomeric excess (50% *ee*) was determined by HPLC with a *Diacel* Chiralpak IA column (EtOAc/hexane = 20:80, 40 bar, flow rate: 1.0 mL/min, λ<sub>max</sub> = 270 nm): *t<sub>r</sub>*(major) = 15.71 min. *t<sub>r</sub>*(minor) = 13.74 min. [α]<sub>D</sub><sup>24</sup> = -2.59 (c = 0.99, CHCl<sub>3</sub>).

**<sup>1</sup>H NMR** (600 MHz, CDCl<sub>3</sub>) δ 7.33 – 7.30 (m, 2H), 7.15 – 7.13 (m, 2H), 7.11 (d, *J* = 7.8 Hz, 2H), 6.86 – 6.83 (m, 2H), 3.79 (s, 3H), 3.61 – 3.56 (m, 1H), 3.52 – 3.47 (m, 1H), 3.34 – 3.30 (m, 1H), 2.89 (dd, *J* = 14.0, 6.6 Hz, 1H), 2.84 (dd, *J* = 14.0, 8.4 Hz, 1H), 2.34 (s, 3H), 2.24 (t, *J* = 6.0 Hz, 1H). **<sup>13</sup>C NMR** (151 MHz, CDCl<sub>3</sub>) δ 158.4, 138.0, 133.6, 130.8, 130.3, 130.0, 129.5, 114.0, 62.5, 55.4, 54.3, 36.9, 21.2.

**HRMS (ESI, *m/z*)** calcd. for C<sub>17</sub>H<sub>20</sub>NaO<sub>2</sub>S<sup>+</sup> [*M*+Na]<sup>+</sup>: 311.1076, found: 311.1093.

**(*R*)-3-(4-chlorophenyl)-2-(*p*-tolylthio)propan-1-ol (5o)**



Purification: flash column chromatography (cyclohexane/EtOAc = 15:1, *R<sub>f</sub>* = 0.2). Colorless liquid (30.50 mg, 35%). The enantiomeric excess (76% *ee*) was determined by HPLC with a *Diacel* Chiralpak IA column (Ethyl acetate/hexane = 30:70, 41 bar, flow rate: 1.0 mL/min, λ<sub>max</sub> = 254 nm): *t<sub>r</sub>*(major) = 7.77 min. *t<sub>r</sub>*(minor) = 5.885 min. [α]<sub>D</sub><sup>23</sup> = -5.2 (c = 0.74, CHCl<sub>3</sub>).

**<sup>1</sup>H NMR** (600 MHz, CDCl<sub>3</sub>) δ 7.31 – 7.28 (m, 2H), 7.28 – 7.25 (m, 2H), 7.17 – 7.14 (m, 2H), 7.11 (d, *J* = 7.8 Hz, 2H), 3.61 – 3.55 (m, 1H), 3.49 (dt, *J* = 11.8, 6.0 Hz, 1H), 3.30 (tdd, *J* = 7.4, 5.8, 4.4 Hz, 1H), 2.88 (d, *J* = 6.0 Hz, 2H), 2.34 (s, 3H), 2.17 (t, *J* = 6.0 Hz, 1H). **<sup>13</sup>C NMR** (151 MHz, CDCl<sub>3</sub>) δ 138.3, 137.3, 133.7, 132.5, 130.7, 130.1, 129.3, 128.7, 62.5, 54.1, 37.0, 21.3.

**HRMS (ESI, *m/z*)** calcd. for C<sub>16</sub>H<sub>17</sub>ClNaOS<sup>+</sup> [*M*+Na]<sup>+</sup>: 315.0581, found: 315.0580.

**(*R*)-3-(4-bromophenyl)-2-(*p*-tolylthio)propan-1-ol (5p)**



Purification: flash column chromatography (cyclohexane/EtOAc = 15:1,  $R_f$  = 0.2). Colorless liquid (35.32 mg, 35%). The enantiomeric excess (31% *ee*) was determined by HPLC with a *Diacel* Chiralpak IA column (Ethyl acetate/hexane = 30:70, 41 bar, flow rate: 1.0 mL/min,  $\lambda_{\max}$  = 270 nm):  $t_r$ (major) = 9.21 min.  $t_r$ (minor) = 6.05 min.  $[\alpha]_D^{25}$  = -11 (c = 0.21, CHCl<sub>3</sub>).

<sup>1</sup>H NMR (600 MHz, CDCl<sub>3</sub>)  $\delta$  7.43 – 7.40 (m, 2H), 7.32 – 7.27 (m, 2H), 7.12 – 7.08 (m, 4H), 3.60 – 3.55 (m, 1H), 3.51 – 3.46 (m, 1H), 3.30 (tdd,  $J$  = 7.4, 5.6, 4.4 Hz, 1H), 2.87 (d,  $J$  = 4.2 Hz, 1H), 2.86 (d,  $J$  = 4.2 Hz, 1H), 2.33 (s, 3H), 2.19 (s, 1H). <sup>13</sup>C NMR (151 MHz, CDCl<sub>3</sub>)  $\delta$  138.3, 137.8, 133.7, 131.6, 131.1, 130.0, 129.2, 120.6, 62.5, 54.0, 37.1, 21.3.

HRMS (ESI, *m/z*) calcd. for C<sub>16</sub>H<sub>17</sub>BrNaOS<sup>+</sup> [M+Na]<sup>+</sup>: 359.0076, found: 359.0091

#### (*R*)-2-(*p*-tolylthio)butan-1-ol (5q)



Purification: flash column chromatography (cyclohexane/EtOAc = 20:1,  $R_f$  = 0.18). Colorless liquid (39.30 mg, 67%). The enantiomeric excess (71% *ee*) was determined by HPLC with a *Diacel* Chiralpak IA column (*i*-PrOH/hexane = 1:49, 40 bar, flow rate: 1.0 mL/min,  $\lambda_{\max}$  = 254 nm):  $t_r$ (major) = 14.70 min.  $t_r$ (minor) = 14.03 min.  $[\alpha]_D^{25}$  = 40.47 (c = 0.3, CHCl<sub>3</sub>).

<sup>1</sup>H NMR (600 MHz, CDCl<sub>3</sub>)  $\delta$  7.35 (d,  $J$  = 8.2 Hz, 2H), 7.11 (d,  $J$  = 8.5 Hz, 2H), 3.61 (dd,  $J$  = 11.4, 4.8 Hz, 1H), 3.49 (dd,  $J$  = 11.4, 6.4 Hz, 1H), 3.00 (dtd,  $J$  = 7.8, 6.4, 4.8 Hz, 1H), 2.33 (s, 3H), 2.30 (s, 1H), 1.68 – 1.61 (m, 1H), 1.58 – 1.50 (m, 1H), 1.08 (t,  $J$  = 7.4 Hz, 3H). <sup>13</sup>C NMR (151 MHz, CDCl<sub>3</sub>)  $\delta$  137.9, 133.8 (2C), 129.9 (2C), 129.5, 63.4, 55.05, 24.4, 21.2, 11.9.

HRMS (ESI, *m/z*) calcd. for C<sub>11</sub>H<sub>16</sub>NaOS<sup>+</sup> [M+Na]<sup>+</sup>: 219.0814, found: 219.0810.

#### (*R*)-2-(*p*-tolylthio)pentan-1-ol (5r)



Purification: flash column chromatography (cyclohexane/EtOAc = 20:1,  $R_f$  = 0.2). Colorless oil (35.80 mg, 53%). The enantiomeric excess (84% *ee*) was determined by HPLC with a *Diacel* Chiralpak IA column (*i*-PrOH/hexane = 1:48, 37 bar, flow rate: 1.0 mL/min,  $\lambda_{\max}$  = 254 nm):  $t_r$ (major) = 12.10 min.  $t_r$ (minor) = 13.19 min.  $[\alpha]_D^{25}$  = 11.26 (c = 0.68, CHCl<sub>3</sub>).

<sup>1</sup>H NMR (600 MHz, CDCl<sub>3</sub>)  $\delta$  7.34 (d,  $J$  = 6.8 Hz, 2H), 7.11 (d,  $J$  = 8.5 Hz, 2H), 3.60 (dd,  $J$  = 11.4, 4.6 Hz, 1H), 3.47 (dd,  $J$  = 11.4, 6.6 Hz, 1H), 3.11 – 3.04 (m, 1H), 2.33 (s, 3H), 2.07 (s,

1H), 1.62 – 1.47 (m, 4H), 0.93 (t,  $J = 6.5$  Hz, 3H).  $^{13}\text{C}$  NMR (151 MHz,  $\text{CDCl}_3$ )  $\delta$  138.0, 133.8 (2C), 129.9 (2C), 129.4, 63.7, 53.0, 33.4, 21.2, 20.4, 14.0.

HRMS (ESI,  $m/z$ ) calcd. for  $\text{C}_{12}\text{H}_{18}\text{NaOS}^+$   $[\text{M}+\text{Na}]^+$ : 233.0971, found: 233.0963.

#### (*R*)-2-cyclohexyl-2-(*p*-tolylthio)ethan-1-ol (5s)



Purification: flash column chromatography (cyclohexane/EtOAc = 50:1,  $R_f = 0.2$ ). Colorless liquid (51.2 mg, 64%). The enantiomeric excess (85% *ee*) was determined by HPLC with a *Diacel* Chiralpak IA column (*i*-PrOH/hexane = 1:19, 39 bar, flow rate: 0.8 mL/min,  $\lambda_{\text{max}} = 254$  nm):  $t_r(\text{major}) = 8.00$  min.  $t_r(\text{minor}) = 7.43$  min.  $[\alpha]_{\text{D}}^{25} = -18.31$  ( $c = 0.46$ ,  $\text{CHCl}_3$ ).

$^1\text{H}$  NMR (600 MHz,  $\text{CDCl}_3$ )  $\delta$  7.34 (d,  $J = 8.1$  Hz, 2H), 7.10 (d,  $J = 8.4$  Hz, 2H), 3.71 (dd,  $J = 11.5, 4.8$  Hz, 1H), 3.58 (dd,  $J = 11.5, 7.0$  Hz, 1H), 2.99 – 2.95 (m, 1H), 2.32 (s, 3H), 2.17 (s, 1H), 2.01 (d,  $J = 11.1$  Hz, 1H), 1.80 – 1.72 (m, 3H), 1.69 – 1.59 (m, 2H), 1.27 – 1.12 (m, 5H).  $^{13}\text{C}$  NMR (151 MHz,  $\text{CDCl}_3$ )  $\delta$  137.5, 132.9 (2C), 131.3, 129.9 (2C), 62.0, 60.5, 39.5, 30.8, 30.7, 26.5, 26.44, 25.43, 21.2.

HRMS (ESI,  $m/z$ ) calcd. for  $\text{C}_{15}\text{H}_{22}\text{NaOS}^+$   $[\text{M}+\text{Na}]^+$ : 273.1284, found: 273.1277.

#### (*R*)-3-cyclohexyl-2-(*p*-tolylthio)propan-1-ol (5t)



Purification: flash column chromatography (cyclohexane/EtOAc = 60:1,  $R_f = 0.15$ ). Colorless liquid (71.00 mg, 84%). The enantiomeric excess (84% *ee*) was determined by HPLC with a *Diacel* Chiralpak IA column (EtOH/hexane = 1:99, 39 bar, flow rate: 1.0 mL/min,  $\lambda_{\text{max}} = 254$  nm):  $t_r(\text{major}) = 10.57$  min.  $t_r(\text{minor}) = 10.10$  min.  $[\alpha]_{\text{D}}^{25} = 2.18$  ( $c = 0.45$ ,  $\text{CHCl}_3$ ).

$^1\text{H}$  NMR (700 MHz,  $\text{CDCl}_3$ )  $\delta$  7.34 (d,  $J = 8.3$  Hz, 2H), 7.11 (d,  $J = 8.8$  Hz, 2H), 3.62 – 3.53 (m, 1H), 3.47 – 3.38 (m, 1H), 3.22 – 3.13 (m, 1H), 2.33 (s, 3H), 2.23 (t,  $J = 7.4$  Hz, 1H), 1.77 – 1.58 (m, 5H), 1.41 – 1.37 (m, 1H), 1.29 – 1.18 (m, 4H), 1.18 – 1.10 (m, 1H), 0.96 – 0.83 (m, 2H).  $^{13}\text{C}$  NMR (176 MHz,  $\text{CDCl}_3$ )  $\delta$  138.1, 134.0, 129.9, 129.2, 63.9, 50.5, 38.8, 34.9, 33.8, 33.0, 26.7, 26.4, 26.3, 21.3.

HRMS (ESI,  $m/z$ ) calcd. for  $\text{C}_{16}\text{H}_{24}\text{NaOS}^+$   $[\text{M}+\text{Na}]^+$ : 287.1440, found: 287.1456.

#### (*R*)-5-phenyl-2-(*p*-tolylthio)pentan-1-ol (5u)



Purification: flash column chromatography (cyclohexane/EtOAc = 45:1,  $R_f$  = 0.15). Colorless liquid (76.87 mg, 85%). The enantiomeric excess (71% *ee*) was determined by HPLC with a *Diacel* Chiralpak IA column (EtOAc/hexane = 1:4, 36 bar, flow rate: 1.0 mL/min,  $\lambda_{\max}$  = 254 nm):  $t_r(\text{major})$  = 9.69 min.  $t_r(\text{minor})$  = 7.13 min.  $[\alpha]_D^{25}$  = 1.33 ( $c$  = 0.45,  $\text{CHCl}_3$ ).

$^1\text{H NMR}$  (600 MHz,  $\text{CDCl}_3$ )  $\delta$  7.32 (d,  $J$  = 8.0 Hz, 2H), 7.29 (d,  $J$  = 7.8 Hz, 2H), 7.21 (d,  $J$  = 7.4 Hz, 1H), 7.19 (d,  $J$  = 6.9 Hz, 2H), 7.11 (d,  $J$  = 8.4 Hz, 2H), 3.59 (dd,  $J$  = 11.4, 4.8 Hz, 1H), 3.48 (dd,  $J$  = 11.4, 6.2 Hz, 1H), 3.11 – 3.05 (m, 1H), 2.70 – 2.59 (m, 2H), 2.34 (s, 3H), 2.18 (s, 1H), 2.01 – 1.92 (m, 1H), 1.86 – 1.78 (m, 1H), 1.69 – 1.61 (m, 1H), 1.60 – 1.51 (m, 1H).  $^{13}\text{C NMR}$  (151 MHz,  $\text{CDCl}_3$ )  $\delta$  142.1, 138.0, 133.9, 129.9, 129.2, 128.6, 128.5, 125.9, 63.7, 53.1, 35.8, 30.8, 29.0, 21.2.

**HRMS (ESI,  $m/z$ )** calcd. for  $\text{C}_{18}\text{H}_{22}\text{NaOS}^+$  [ $\text{M}+\text{Na}$ ] $^+$ : 309.1284, found: 309.1281.

#### (*R*)-2-(*p*-tolylthio)pent-4-en-1-ol (5v)



Purification: flash column chromatography (cyclohexane/EtOAc = 35:1,  $R_f$  = 0.16). Colorless liquid (40.50 mg, 65%). The enantiomeric excess (53% *ee*) was determined by HPLC with a *Diacel* Chiralpak IA column (EtOH/hexane = 1:99, 39 bar, flow rate: 1.0 mL/min,  $\lambda_{\max}$  = 254 nm):  $t_r(\text{major})$  = 13.26 min.  $t_r(\text{minor})$  = 12.72 min.  $[\alpha]_D^{25}$  = 3.14 ( $c$  = 0.18,  $\text{CHCl}_3$ ).

$^1\text{H NMR}$  (700 MHz,  $\text{CDCl}_3$ )  $\delta$  7.35 (dd,  $J$  = 8.5, 2.3 Hz, 2H), 7.12 (dd,  $J$  = 8.6, 0.8 Hz, 2H), 5.89 (ddt,  $J$  = 17.2, 10.2, 7.0 Hz, 1H), 5.15 – 5.09 (m, 2H), 3.65 – 3.61 (m, 1H), 3.52 (dd,  $J$  = 11.5, 6.4 Hz, 1H), 3.17 – 3.12 (m, 1H), 2.38 – 2.35 (m, 2H), 2.34 (s, 3H).  $^{13}\text{C NMR}$  (176 MHz,  $\text{CDCl}_3$ )  $\delta$  138.1, 135.1, 133.8, 129.9, 129.1, 117.5, 63.2, 52.2, 35.8, 21.2.

**HRMS (ESI,  $m/z$ )** calcd. for  $\text{C}_{12}\text{H}_{16}\text{NaOS}^+$  [ $\text{M}+\text{Na}$ ] $^+$ : 231.0814, found: 231.0815.

#### (*R*)-2-(*p*-tolylthio)hex-4-yn-1-ol (5w)



Purification: flash column chromatography (cyclohexane/EtOAc = 45:1,  $R_f$  = 0.22). Colorless oil (40.00 mg, 60%). The enantiomeric excess (38% *ee*) was determined by HPLC with a *Diacel* Chiralpak IA column (*i*-PrOH/hexane = 1:66, 39 bar, flow rate: 0.8 mL/min,  $\lambda_{\max}$  = 254 nm):  $t_r(\text{major})$  = 25.31 min.  $t_r(\text{minor})$  = 26.97 min.  $[\alpha]_D^{25}$  = 0.24 ( $c$  = 0.38,  $\text{CHCl}_3$ ).

$^1\text{H NMR}$  (600 MHz,  $\text{CDCl}_3$ )  $\delta$  7.38 – 7.35 (m, 2H), 7.12 (d,  $J$  = 7.8 Hz, 2H), 3.78 (dd,  $J$  = 11.5, 5.1 Hz, 1H), 3.65 (dd,  $J$  = 11.5, 6.0 Hz, 1H), 3.21 (ddd,  $J$  = 10.8, 8.1, 6.0 Hz, 1H), 2.54 – 2.48

(m, 1H), 2.45 – 2.39 (m, 1H), 2.33 (s, 3H), 1.79 (t,  $J = 2.6$  Hz, 3H).  $^{13}\text{C}$  NMR (151 MHz,  $\text{CDCl}_3$ )  $\delta$  138.2, 133.7, 129.9, 129.0, 78.2, 75.7, 63.3, 51.4, 22.0, 21.2, 3.6.

HRMS (ESI,  $m/z$ ) calcd. for  $\text{C}_{13}\text{H}_{16}\text{NaOS}^+$   $[\text{M}+\text{Na}]^+$ : 243.0814, found: 243.0803.

***tert*-butyl (*R*)-4-(2-oxo-1-(*p*-tolylthio)ethyl)piperidine-1-carboxylate (4x)**



Purification: flash column chromatography (cyclohexane/EtOAc = 20:1,  $R_f = 0.13$ ). Colorless oil (51.00 mg, 48%). The enantiomeric excess (71% *ee*) was determined by HPLC with a *Diacel* Chiralpak IA column (*i*-PrOH /hexane = 1:97, 37 bar, flow rate: 1.0 mL/min,  $\lambda_{\text{max}} = 254$  nm):  $t_r(\text{major}) = 7.99$  min.  $t_r(\text{minor}) = 9.14$  min.  $[\alpha]_{\text{D}}^{25} = 13.34$  ( $c = 0.81$ ,  $\text{CHCl}_3$ ).

$^1\text{H}$  NMR (400 MHz,  $\text{CDCl}_3$ )  $\delta$  9.36 (d,  $J = 4.6$  Hz, 1H), 7.29 – 7.24 (m, 2H), 7.09 (d,  $J = 8.5$  Hz, 2H), 4.13 (s, 2H), 3.25 (dd,  $J = 9.2, 4.6$  Hz, 1H), 2.79 – 2.63 (m, 2H), 2.30 (s, 3H), 2.13 (d,  $J = 12.2$  Hz, 1H), 1.94 – 1.83 (m, 1H), 1.72 – 1.62 (m, 1H), 1.44 (s, 9H), 1.38 – 1.23 (m, 2H).

$^{13}\text{C}$  NMR (101 MHz,  $\text{CDCl}_3$ )  $\delta$  193.9, 154.8, 138.8, 133.8, 130.2, 128.0, 79.7, 63.4, 35.0, 28.9, 28.5, 28.1, 21.3.

HRMS (ESI,  $m/z$ ) calcd. for  $\text{C}_{19}\text{H}_{27}\text{NNaO}_3\text{S}^+$   $[\text{M}+\text{Na}]^+$ : 372.1604, found: 372.1644.

***S*-(4-bromophenyl)-*N*-(4-nitrophenyl)thiohydroxylamine (8)**



Purification: flash column chromatography (cyclohexane/EtOAc = 20:1,  $R_f = 0.12$ ). Yellow solid (51.00 mg, 48%). m.p. 162.1 – 163. 5 °C.  $^1\text{H}$  NMR (600 MHz, DMSO- $\text{D}_6$ )  $\delta$  8.94 (s, 1H), 8.00 (d,  $J = 9.2$  Hz, 2H), 7.41 (d,  $J = 8.6$  Hz, 2H), 7.06 – 6.98 (m, 4H).  $^{13}\text{C}$  NMR (151 MHz, DMSO- $\text{D}_6$ )  $\delta$  153.9, 139.9, 139.4, 132.1, 126.0, 124.7, 118.8, 114.2.

HRMS (ESI,  $m/z$ ) calcd. for  $\text{C}_{12}\text{H}_{10}\text{BrN}_2\text{O}_2\text{S}^+$   $[\text{M}+\text{H}]^+$ : 324.9641, found: 324.9685.

**Cinnamaldehyde (9)**

Purification: flash column chromatography (EtOAc/cyclohexane = 60:1,  $R_f = 0.2$ ). Colorless liquid.  $^1\text{H}$  NMR (400 MHz,  $\text{CDCl}_3$ )  $\delta$  9.71 – 9.68 (m, 1H), 7.58 – 7.55 (m, 2H), 7.49 – 7.42 (m, 4H), 6.75 – 6.68 (m, 1H).  $^{13}\text{C}$  NMR (101 MHz,  $\text{CDCl}_3$ )  $\delta$  193.8, 152.9, 134.1, 131.4, 129.2, 128.7, 128.6.

## 7. Large-scale synthesis and mechanistic studies

### (a) 3 mmol-scale synthesis of **5a**



A 50 mL plastic centrifuge tube (inside diameter: 26 mm) was charged with **1a** (9.00 mmol, 1.21 g, 3.00 equiv.), **2a** (3.00 mmol, 372.60 mg, 1.00 equiv.),  $I_2$  (0.30 mmol, 76.10 mg, 10 mol%), **3a** (0.90 mmol, 153.23 mg, 30 mol%),  $n\text{-Bu}_4\text{NPF}_6$  (6.00 mmol, 2.32 g, 2.00 equiv.), MeCN (30 mL), H<sub>2</sub>O (100  $\mu\text{L}$ ) and a proper stir bar. The tube was open to air with two groups of Pt electrodes ( $1 \times 1$  cm<sup>2</sup>, approx. 5 mm interelectrode gap, each group worked separately with independent power supply) and the reaction mixture was electrolyzed under a constant current of 5 mA for 6 h. Then the mixture was diluted with MeCN (15 mL).  $\text{NaBH}_4$  (15 mmol, 0.57 g, 5.0 equiv.) was added and the mixture was stirred at room temperature for 3 h. TLC monitored the reaction until it completed. The reaction mixture was treated with water (20 mL) and extracted with dichloromethane ( $3 \times 40$  mL). The combined organic layers were washed with brine (20 mL), dried over  $\text{Na}_2\text{SO}_4$ , filtered and the solvent was removed under reduced pressure. The crude product was purified by flash column chromatography, furnishing the desired product **5a**. Colorless liquid, 0.51 g. (yield 65%, 80% *ee*).

### (b) 9 mmol-scale synthesis of **5a**



A 150 mL round electrolyzer (inside diameter: 75 mm) was charged with **1a** (27.00 mmol, 3.62 g, 3.00 equiv.), **2a** (9.00 mmol, 1.12 g, 1.00 equiv.), **3a** (2.70 mmol, 0.46 g, 30 mol%), I<sub>2</sub> (0.90 mmol, 228.43 mg, 10 mol%), *n*-Bu<sub>4</sub>NPF<sub>6</sub> (18.00 mmol, 6.97 g, 2.00 equiv.), MeCN (90 mL), H<sub>2</sub>O (300 μL) and a proper stir bar. The electrolyzer was open to air with two graphite electrodes (40 × 25 × 3 mm, approx. 5 mm interelectrode gap) and the reaction mixture was electrolyzed under a constant current of 60 mA for 9 h. Then the mixture was diluted with MeCN (50 mL). NaBH<sub>4</sub> (45.00 mmol, 1.71 g, 5.00 equiv.) was added and the mixture was stirred at room temperature for 3 h. TLC monitored the reaction until it completed. The reaction mixture was treated with water (50 mL) and extracted with dichloromethane (3×40 mL). The combined organic layers were washed with brine (30 mL), dried over Na<sub>2</sub>SO<sub>4</sub>, filtered and the solvent was removed under reduced pressure. The crude product was purified by flash column chromatography, furnishing the desired product **5a**. Colorless liquid, 2.2 g. (yield 93%, 57% *ee*).

## 8. Preparation of compounds **6a**, **6b** and **6c**.

### Preparation of compound **6a**



To a solution of **5n** (70.0 mg, 0.28 mmol, 1.00 equiv.) in dichloromethane (3 mL) was added 3,5-dinitrobenzoyl chloride (96.7 mg, 0.42 mmol, 1.50 equiv.), followed by the addition of Et<sub>3</sub>N (58.5 μL, 0.42 mmol, 1.50 equiv.). The reaction mixture was stirred at room temperature for 2 h. Then the reaction mixture was treated with sat. aq. NaHCO<sub>3</sub> solution (2 mL). The phases were separated, and the aqueous phase was extracted with EtOAc (3 x 5 mL). The combined organic extracts were washed with brine (2 mL), dried over Na<sub>2</sub>SO<sub>4</sub>, filtered and the solvent was removed under reduced pressure. The crude product was purified by column chromatography (SiO<sub>2</sub>, pentane/EtOAc = 20:1) to afford ester **6a** (47.00 mg, yield 38%) as a light-yellow oil. The major enantiomer (*t*<sub>r</sub> = 7.25 min) was separated by chiral HPLC and crystallized from ether to give single crystals suitable for X-ray diffraction.

The enantiomeric excess (53% *ee*) was determined by HPLC with a *Diacel* Chiralpak IA column (20% EtOAc /Hexane, 39 bar, flow rate: 1.0 mL/min, λ<sub>max</sub> = 254 nm): *t*<sub>r</sub>(major) = 7.25 min. *t*<sub>r</sub>(minor) = 6.74 min. [α]<sub>D</sub><sup>22</sup> = - 12.71 (c = 1, CHCl<sub>3</sub>).

<sup>1</sup>H NMR (700 MHz, CDCl<sub>3</sub>) δ 9.19 (t, *J* = 2.2 Hz, 1H), 8.97 (d, *J* = 2.2 Hz, 2H), 7.34 – 7.31 (m, 2H), 7.01 (d, *J* = 9.4 Hz, 2H), 4.68 (dd, *J* = 11.5, 6.4 Hz, 1H), 4.58 (dd, *J* = 11.5, 7.2 Hz, 1H), 3.37 (ddd, *J* = 7.2, 6.4, 4.7 Hz, 1H), 2.21 (s, 3H), 2.02 – 1.95 (m, 1H), 1.85 – 1.68 (m, 4H), 1.53 – 1.48 (m, 1H), 1.33 – 1.28 (m, 2H), 1.22 – 1.19 (m, 1H), 0.89 – 0.79 (m, 2H). <sup>13</sup>C

**NMR** (151 MHz, CDCl<sub>3</sub>)  $\delta$  162.4, 148.7, 137.5, 133.8, 132.4 (2C), 131.9, 130.0 (2C), 129.5 (2C), 122.4, 68.2, 54.7, 40.0, 30.8, 29.8, 26.49, 26.47, 26.4, 21.1.

**HRMS (ESI, m/z)** calcd. for C<sub>22</sub>H<sub>24</sub>N<sub>2</sub>NaO<sub>6</sub>S<sup>+</sup> [M+Na]<sup>+</sup>: 467.1248, found: 467.1247.

Table S6 Crystal data and structure refinement for **6a**Crystal data and structure refinement of **6a**

|                                                 |                                                                                                             |
|-------------------------------------------------|-------------------------------------------------------------------------------------------------------------|
| <b>Identification code</b>                      | <b>ZW_CH119</b>                                                                                             |
| <b>Empirical formula</b>                        | $C_{22}H_{24}N_2O_6S$                                                                                       |
| <b>Molecular weight</b>                         | 444.49                                                                                                      |
| <b>Temperature [K]</b>                          | 100                                                                                                         |
| <b>Wavelength [Å]</b>                           | 1.54178                                                                                                     |
| <b>Crystal system, space group</b>              | monoclinic, $P2_1$                                                                                          |
| <b>Unit cell dimensions</b>                     | a = 12.34031 (9) Å, alpha = 90<br>b = 7.13358 (5) Å, beta = 101.4062 (3)<br>c = 24.66536 (18) Å, gamma = 90 |
| <b>Volume [Å<sup>3</sup>]</b>                   | 2128.42 (3)                                                                                                 |
| <b>Z, Density (calculated)</b>                  | 4, 1.387 g/cm <sup>3</sup>                                                                                  |
| <b>Absorption coefficient [mm<sup>-1</sup>]</b> | 1.716                                                                                                       |
| <b>F (000)</b>                                  | 936.0                                                                                                       |
| <b>Crystal size [mm]</b>                        | 0.05 x 0.06 x 0.59                                                                                          |
| <b>θ-range for data collection</b>              | 3.654 – 68.209°                                                                                             |
| <b>Index ranges</b>                             | -14 ≤ h ≤ 14, -8 ≤ k ≤ 8, -29 ≤ l ≤ 29                                                                      |
| <b>Reflections collected</b>                    | 34981                                                                                                       |
| <b>Independent reflections</b>                  | 9212                                                                                                        |
| <b>Completeness to θ = 67.679°</b>              | 98%                                                                                                         |
| <b>Absorption correction</b>                    | multi-scan                                                                                                  |
| <b>Max. and min. transmission</b>               | 0.753 and 0.445                                                                                             |
| <b>Refinement method</b>                        | Full-matrix least-squares on F <sup>2</sup>                                                                 |
| <b>Data / restraints / parameters</b>           | 7622 / 1 / 561                                                                                              |
| <b>Goodness-of-fit on F<sup>2</sup></b>         | 1.124                                                                                                       |
| <b>Final R indices [I &gt; 2σ(I)]</b>           | R <sub>1</sub> = 0.0552, wR <sub>2</sub> = 0.1228                                                           |
| <b>R indices (all data)</b>                     | R <sub>1</sub> = 0.0567, wR <sub>2</sub> = 0.1244                                                           |
| <b>Largest diff. peak and hole</b>              | 0.69 nd -0.53 e <sup>-</sup> /Å <sup>-3</sup>                                                               |

### Preparation of (2*S*,3*R*)-4-phenyl-3-(*p*-tolylthio)butan-2-ol (**6b**).<sup>3</sup>

An 18 mL tube (diameter: 13 mm) was charged with **1** (0.90 mmol, 3.00 equiv.), **2** (0.30 mmol, 1.00 equiv.), I<sub>2</sub> (7.61 mg, 10 mol%), **3a** (15.30 mg, 30 mol%), *n*-Bu<sub>4</sub>NPF<sub>6</sub> (232.0 mg, 0.2 m), MeCN (3 mL), H<sub>2</sub>O (10 μL) and a proper PTFE coated stir bar. The tube was sealed with a septum equipped with two Pt electrodes (1×1 cm<sup>2</sup>, approx. 5 mm interelectrode gap) and the reaction mixture was electrolyzed under a constant current of 5 mA for 6 h. The reaction mixture was quickly filtered through a short pad of silica gel with toluene. The fractions containing the product were combined and used in the following step without further purification.

The toluene solution of the intermediate  $\alpha$ -sulfenylaldehyde obtained was added dropwise to a solution of MeMgBr (5.0 equiv. based on 4-methyl thiophenol) cooled to -10 °C. The reaction was monitored by TLC and stirred until all the intermediate  $\alpha$ -sulfenylaldehyde was consumed. The reaction was quenched with saturated NH<sub>4</sub>Cl and partitioned between water and EtOAc. The aqueous layer was then extracted with EtOAc and the combined organic layers were washed with brine, dried over MgSO<sub>4</sub>, filtered and evaporated to dryness. The mixture was purified by flash column chromatography (cyclohexane/EtOAc = 45:1, *R<sub>f</sub>* = 0.1) to afford the secondary alcohol **6b** as a colorless oil (56.50 mg, two-step yield, 69%).



The diastereomeric ratio (94:6) was determined by HPLC with a *Diacel* Chiralpak IA column (*i*-PrOH/hexane = 3:97, 38 bar, flow rate: 1.0 mL/min,  $\lambda_{\text{max}}$  = 254 nm): *t<sub>r</sub>*(major) = 11.79 min. *t<sub>r</sub>*(minor) = 16.02 min.  $[\alpha]_{\text{D}}^{24}$  = -25.39 (*c* = 0.40, CHCl<sub>3</sub>).

<sup>1</sup>H NMR (600 MHz, CDCl<sub>3</sub>)  $\delta$  7.32 – 7.28 (m, 2H), 7.25 – 7.21 (m, 3H), 7.20 – 7.18 (m, 2H), 7.06 – 7.03 (m, 2H), 3.90 (pd, *J* = 6.4, 3.2 Hz, 1H), 3.36 (ddd, *J* = 9.0, 5.8, 3.2 Hz, 1H), 3.03 (dd, *J* = 14.4, 5.8 Hz, 1H), 2.81 (dd, *J* = 14.4, 9.0 Hz, 1H), 2.30 (s, 3H), 1.28 (d, *J* = 6.6 Hz, 3H). <sup>13</sup>C NMR (151 MHz, CDCl<sub>3</sub>)  $\delta$  139.4, 137.6, 132.9, 131.2, 129.9, 129.3, 128.5, 126.6, 68.0, 60.8, 36.8, 21.2, 19.2.

HRMS (ESI, *m/z*) calcd. for C<sub>17</sub>H<sub>20</sub>NaOS<sup>+</sup> [*M*+Na]<sup>+</sup>: 295.1127, found: 295.1142.

### Preparation of ethyl (*R*, *E*)-5-phenyl-4-(*p*-tolylthio)pent-2-enoate (**6c**).<sup>4</sup>

An 18 mL tube (diameter: 13 mm) was charged with **1** (0.90 mmol, 3.00 equiv.), **2** (0.30 mmol, 1.00 equiv.), I<sub>2</sub> (7.61 mg, 10 mol%), **3a** (15.30 mg, 30 mol%), *n*-Bu<sub>4</sub>NPF<sub>6</sub> (232.0 mg, 0.2 m), MeCN (3 mL), H<sub>2</sub>O (10 μL) and a proper PTFE coated stir bar. The tube was sealed with a septum equipped with two Pt electrodes (1×1 cm<sup>2</sup>, approx. 5 mm interelectrode gap) and the reaction mixture was electrolyzed under a constant current of 5 mA for 6 h. The mixture was quickly filtered through a short pad of silica gel (cyclohexane/EtOAc = 10:1) and concentrated in vacuo.

The above mixture was dissolved in 3 mL anhydrous dichloromethane and cooled to -78 °C. A pre-mixed solution of *n*-BuLi (0.54 mL, 2.5 M, 4.5 equiv. based on 4-methyl thiophenol) and triethylphosphonoacetate (0.31 g, 4.5 equiv.) in dichloromethane (5 mL) at -78 °C was added to the aforementioned mixture. After stirring at -78 °C for 1 h, the solution was quenched with

NH<sub>4</sub>Cl (sat), extracted (dichloromethane), dried (Na<sub>2</sub>SO<sub>4</sub>) and concentrated in vacuo. The mixture was purified by flash column chromatography (cyclohexane/EtOAc = 150:1, *R<sub>f</sub>* = 0.1) to afford the title compound **6c** as a colorless oil. (63.80 mg, two steps, 65%).



The enantiomeric excess (83% *ee*) was determined by HPLC with a *Diacel* Chiralpak IC column (EtOH/hexane = 1:99, 40 bar, flow rate: 1.0 mL/min,  $\lambda_{\text{max}}$  = 254 nm): *t<sub>r</sub>*(major) = 9.24 min. *t<sub>r</sub>*(minor) = 7.14 min.  $[\alpha]_{\text{D}}^{24}$  = 48.28 (*c* = 0.86, CHCl<sub>3</sub>).

**<sup>1</sup>H NMR** (600 MHz, CDCl<sub>3</sub>)  $\delta$  7.31 – 7.27 (m, 2H), 7.27 – 7.25 (m, 2H), 7.24 – 7.21 (m, 1H), 7.19 – 7.16 (m, 2H), 7.09 (d, *J* = 7.8 Hz, 2H), 6.82 (dd, *J* = 15.6, 9.2 Hz, 1H), 5.39 (dd, *J* = 15.6, 0.8 Hz, 1H), 4.13 (q, *J* = 7.0 Hz, 2H), 3.83 – 3.78 (m, 1H), 3.07 (dd, *J* = 14.0, 6.2 Hz, 1H), 2.94 (dd, *J* = 14.0, 8.4 Hz, 1H), 2.32 (s, 3H), 1.24 (t, *J* = 7.0 Hz, 3H). **<sup>13</sup>C NMR** (151 MHz, CDCl<sub>3</sub>)  $\delta$  166.1, 146.9, 138.4, 138.0, 134.4, 129.9, 129.5, 129.3, 128.6, 126.9, 121.7, 60.4, 52.6, 40.3, 21.3, 14.3.

**HRMS (ESI, *m/z*)** calcd. for C<sub>20</sub>H<sub>22</sub>NaO<sub>2</sub>S<sup>+</sup> [*M*+Na]<sup>+</sup>: 349.1233, found: 349.1218.

## Reference

- (1) Zhou, Q.; Li, J.; Wang, T.; Yang, X. Base-Promoted S-Arylation of Sulfenamides for the Synthesis of Sulfilimines. *Org.Lett.* **2023**, *25*, 4335-4339.
- (2) Dillon, R. T.; Young, W. G. The Preparation of Anhydrous Hydrogen Iodide. *J. Am. Chem. Soc.* **1929**, *51*, 2389-2391.
- (3) Sheppard, T.; Rota, F.; Benhamou, L. Asymmetric Synthesis of Secondary Alcohols and 1,2-Disubstituted Epoxides via Organocatalytic Sulfenylation. *Synlett* **2015**, *27*, 33-36.
- (4) Armstrong, A.; Challinor, L.; Moir, J. H. Exploiting Organocatalysis: Enantioselective Synthesis of Vinyl Glycines by Allylic Sulfimide [2,3] Sigmatropic Rearrangement. *Angew. Chem. Int. Ed.* **2007**, *46*, 5369-5372.

## 9. Copies of NMR spectra

$^1\text{H}$  NMR spectrum of compound **5a**



$^{13}\text{C}$  NMR spectrum of compound **5a**







### <sup>1</sup>H NMR spectrum of compound **5d**



### <sup>13</sup>C NMR spectrum of compound **5d**



<sup>1</sup>H NMR spectrum of compound **5e**



<sup>13</sup>C NMR spectrum of compound **5e**



<sup>1</sup>H NMR spectrum of compound **5f**



<sup>13</sup>C NMR spectrum of compound **5f**



<sup>1</sup>H NMR spectrum of compound **5g**



<sup>13</sup>C NMR spectrum of compound **5g**



$^{19}\text{F}$  NMR spectrum of compound **5g**



$^1\text{H}$  NMR spectrum of compound **5h**



$^{13}\text{C}$  NMR spectrum of compound **5h**



$^1\text{H}$  NMR spectrum of compound **5i**



### <sup>13</sup>C NMR spectrum of compound **5i**



### <sup>1</sup>H NMR spectrum of compound **5j**





# <sup>13</sup>C NMR spectrum of compound **5j**

CH05630157B  
30157B single\_pulse



# <sup>19</sup>F NMR spectrum of compound **5j**

CH05630157B  
30157B single\_pulse



<sup>1</sup>H NMR spectrum of compound **5k**



<sup>13</sup>C NMR spectrum of compound **5k**



<sup>1</sup>H NMR spectrum of compound **51**



<sup>13</sup>C NMR spectrum of compound **51**





# <sup>1</sup>H NMR spectrum of compound 5n



# <sup>13</sup>C NMR spectrum of compound 5n



# <sup>1</sup>H NMR spectrum of compound **5o**



# <sup>13</sup>C NMR spectrum of compound **5o**



### <sup>1</sup>H NMR spectrum of compound **5p**



### <sup>13</sup>C NMR spectrum of compound **5p**



<sup>1</sup>H NMR spectrum of compound **5q**



<sup>13</sup>C NMR spectrum of compound **5q**



<sup>1</sup>H NMR spectrum of compound **5r**



<sup>13</sup>C NMR spectrum of compound **5r**



<sup>1</sup>H NMR spectrum of compound **5s**



<sup>13</sup>C NMR spectrum of compound **5s**



<sup>1</sup>H NMR spectrum of compound **5t**



<sup>13</sup>C NMR spectrum of compound **5t**



<sup>1</sup>H NMR spectrum of compound **5u**



<sup>13</sup>C NMR spectrum of compound **5u**



<sup>1</sup>H NMR spectrum of compound **5v**



<sup>13</sup>C NMR spectrum of compound **5v**



<sup>1</sup>H NMR spectrum of compound **5w**



<sup>13</sup>C NMR spectrum of compound **5w**







<sup>1</sup>H NMR spectrum of compound **6a**



<sup>13</sup>C NMR spectrum of compound **6a**





# <sup>1</sup>H NMR spectrum of compound 6c



# <sup>13</sup>C NMR spectrum of compound 6c



### <sup>1</sup>H NMR spectrum of compound **8**



### <sup>13</sup>C NMR spectrum of compound **8**







## 10. Copies of HPLC spectra

### (*R*)-3-phenyl-2-(*p*-tolylthio)propan-1-ol (5a)



Signal 4: DAD1 A, Sig=254,4 Ref=360,100

| Peak # | RetTime [min] | Type | Width [min] | Area [mAU*s] | Height [mAU] | Area %  |
|--------|---------------|------|-------------|--------------|--------------|---------|
| 1      | 15.807        | BB   | 0.5448      | 5781.57129   | 153.00375    | 49.6755 |
| 2      | 17.861        | BB   | 0.9134      | 5857.11133   | 93.67904     | 50.3245 |



Signal 1: DAD1 B, Sig=254,4 Ref=360,100

| Peak # | RetTime [min] | Type | Width [min] | Area [mAU*s] | Height [mAU] | Area %  |
|--------|---------------|------|-------------|--------------|--------------|---------|
| 1      | 15.974        | BB   | 0.5093      | 2496.21704   | 70.11860     | 7.2290  |
| 2      | 18.027        | BB   | 1.3168      | 3.20346e4    | 335.85004    | 92.7710 |

The enantiomeric excess (86% *ee*) was determined by HPLC with a *Diacel* Chiralpak IA column (*i*-PrOH/hexane = 3:97, 38 bar, flow rate: 1.0 mL/min,  $\lambda_{\text{max}} = 254$  nm):  $t_{\text{r}}(\text{major}) = 18.03$  min.  $t_{\text{r}}(\text{minor}) = 15.97$  min.  $[\alpha]_{\text{D}}^{24} = -0.63$  ( $c = 0.59$ ,  $\text{CHCl}_3$ ).

**(R)-2-((4-isopropylphenyl)thio)-3-phenylpropan-1-ol (5b)**



Signal 1: DAD1 B, Sig=254,16 Ref=360,100

| Peak # | RetTime [min] | Type | Width [min] | Area [mAU*s] | Height [mAU] | Area %  |
|--------|---------------|------|-------------|--------------|--------------|---------|
| 1      | 8.051         | BV   | 0.5037      | 6563.79590   | 188.75554    | 48.8581 |
| 2      | 9.337         | VB   | 0.5958      | 6870.62354   | 162.98740    | 51.1419 |



Signal 1: DAD1 B, Sig=254,16 Ref=360,100

| Peak # | RetTime [min] | Type | Width [min] | Area [mAU*s] | Height [mAU] | Area %  |
|--------|---------------|------|-------------|--------------|--------------|---------|
| 1      | 8.163         | BB   | 0.3566      | 195.03433    | 7.27883      | 6.4875  |
| 2      | 9.370         | BB   | 0.5201      | 2811.28882   | 74.18294     | 93.5125 |

The enantiomeric excess (87% ee) was determined by HPLC with a *Diacel Chiralpak IA* column (EtOAc/hexane = 1:4, 29 bar, flow rate: 0.8 mL/min,  $\lambda_{\max}$  = 254 nm):  $t_r(\text{major})$  = 9.37 min.  $t_r(\text{minor})$  = 8.16 min.  $[\alpha]_D^{24}$  = 0.26 (c = 3.68, CHCl<sub>3</sub>).

**(R)-2-((4-(*tert*-butyl)phenyl)thio)-3-phenylpropan-1-ol (5c)**



Signal 4: DAD1 A, Sig=254,4 Ref=360,100

| Peak # | RetTime [min] | Type | Width [min] | Area [mAU*s] | Height [mAU] | Area %  |
|--------|---------------|------|-------------|--------------|--------------|---------|
| 1      | 13.667        | BB   | 0.4230      | 1784.82239   | 60.00216     | 13.1109 |
| 2      | 15.996        | BB   | 0.7657      | 1.18284e4    | 227.84514    | 86.8891 |

The enantiomeric excess (73% *ee*) was determined by HPLC with a *Diacel* Chiralpak IA column (*i*-PrOH/hexane = 1:49, 37 bar, flow rate: 1.0 mL/min,  $\lambda_{\text{max}} = 254$  nm):  $t_r(\text{major}) = 16.00$  min.  $t_r(\text{minor}) = 13.67$  min.  $[\alpha]_{\text{D}}^{24} = -0.66$  ( $c = 0.64$ ,  $\text{CHCl}_3$ ).

**(R)-2-((4-methoxyphenyl)thio)-3-phenylpropan-1-ol (5d)**



Signal 1: DAD1 B, Sig=254,16 Ref=360,100

| Peak # | RetTime [min] | Type | Width [min] | Area [mAU*s] | Height [mAU] | Area %  |
|--------|---------------|------|-------------|--------------|--------------|---------|
| 1      | 13.747        | MM   | 0.5254      | 1035.32214   | 32.84340     | 52.3150 |
| 2      | 18.998        | MM   | 0.7963      | 943.69330    | 19.75204     | 47.6850 |



Signal 1: DAD1 B, Sig=254,4 Ref=360,100

| Peak # | RetTime [min] | Type | Width [min] | Area [mAU*s] | Height [mAU] | Area %  |
|--------|---------------|------|-------------|--------------|--------------|---------|
| 1      | 13.049        | BB   | 0.4515      | 739.15900    | 23.98428     | 4.4732  |
| 2      | 17.433        | BB   | 1.1894      | 1.57851e4    | 191.95587    | 95.5268 |

The enantiomeric excess (91% *ee*) was determined by HPLC with a *Diacel* Chiralpak IA column (EtOAc/hexane = 1:4, 38 bar, flow rate: 1.0 mL/min,  $\lambda_{\max}$  = 254 nm):  $t_r$ (major) = 17.43 min.  $t_r$ (minor) = 13.05 min.  $[\alpha]_D^{24}$  = 3.17 (c = 0.54, CHCl<sub>3</sub>).

**(R)-2-((3,4-dimethylphenyl)thio)-3-phenylpropan-1-ol (5e)**



Signal 1: DAD1 B, Sig=254,4 Ref=360,100

| Peak # | RetTime [min] | Type | Width [min] | Area [mAU*s] | Height [mAU] | Area %  |
|--------|---------------|------|-------------|--------------|--------------|---------|
| 1      | 9.263         | VV   | 0.3873      | 1.33271e4    | 509.25266    | 47.7435 |
| 2      | 11.067        | VB   | 0.5806      | 1.45868e4    | 382.76263    | 52.2565 |



Signal 1: DAD1 B, Sig=254,4 Ref=360,100

| Peak # | RetTime [min] | Type | Width [min] | Area [mAU*s] | Height [mAU] | Area %  |
|--------|---------------|------|-------------|--------------|--------------|---------|
| 1      | 9.147         | VB   | 0.4713      | 4.07982e4    | 1317.36536   | 95.5910 |
| 2      | 11.362        | BV   | 0.4254      | 1881.74158   | 63.56437     | 4.4090  |

The enantiomeric excess (91% *ee*) was determined by HPLC with a *Diacel* Chiralpak IA column (EtOAc/hexane = 1:4, 31 bar, flow rate: 0.8 mL/min,  $\lambda_{\max}$  = 254 nm):  $t_r$ (major) = 9.15 min.  $t_r$ (minor) = 11.36 min.  $[\alpha]_D^{25}$  = -1.10 (c = 1.61, CHCl<sub>3</sub>).

**(R)-3-phenyl-2-(phenylthio)propan-1-ol (5f)**



Signal 4: DAD1 A, Sig=254,4 Ref=360,100

| Peak # | RetTime [min] | Type | Width [min] | Area [mAU*s] | Height [mAU] | Area %  |
|--------|---------------|------|-------------|--------------|--------------|---------|
| 1      | 9.244         | BB   | 0.3373      | 4150.03906   | 181.15094    | 50.6088 |
| 2      | 11.381        | BB   | 0.5351      | 4050.19092   | 114.38026    | 49.3912 |



Signal 4: DAD1 A, Sig=254,4 Ref=360,100

| Peak # | RetTime [min] | Type | Width [min] | Area [mAU*s] | Height [mAU] | Area %  |
|--------|---------------|------|-------------|--------------|--------------|---------|
| 1      | 9.382         | BB   | 0.2826      | 807.14862    | 41.55474     | 6.7539  |
| 2      | 11.415        | BB   | 0.6222      | 1.11437e4    | 276.49271    | 93.2461 |

The enantiomeric excess (86% *ee*) was determined by HPLC with a *Diacel Chiralpak IA* column (EtOAc/hexane = 1:4, 37 bar, flow rate: 1.0 mL/min,  $\lambda_{\max}$  = 254 nm):  $t_r(\text{major})$  = 11.42 min.  $t_r(\text{minor})$  = 9.38 min.  $[\alpha]_D^{24}$  = -8.53 ( $c$  = 0.10,  $\text{CHCl}_3$ ).

**(R)-2-((4-fluorophenyl)thio)-3-phenylpropan-1-ol (5g)**



Signal 4: DAD1 A, Sig=254,4 Ref=360,100

| Peak # | RetTime [min] | Type | Width [min] | Area [mAU*s] | Height [mAU] | Area %  |
|--------|---------------|------|-------------|--------------|--------------|---------|
| 1      | 8.531         | BB   | 0.3531      | 5672.29980   | 238.85959    | 50.4614 |
| 2      | 11.718        | BB   | 0.7360      | 5568.56885   | 114.38321    | 49.5386 |



Signal 4: DAD1 A, Sig=254,4 Ref=360,100

| Peak # | RetTime [min] | Type | Width [min] | Area [mAU*s] | Height [mAU] | Area %  |
|--------|---------------|------|-------------|--------------|--------------|---------|
| 1      | 8.733         | BB   | 0.2573      | 216.99179    | 12.33034     | 8.7518  |
| 2      | 11.914        | BB   | 0.6386      | 2262.40527   | 52.72579     | 91.2482 |

The enantiomeric excess (82% *ee*) was determined by HPLC with a *Diacel Chiralpak IA* column (EtOAc/hexane = 1:4, 38 bar, flow rate: 1.0 mL/min,  $\lambda_{\text{max}} = 254$  nm):  $t_r(\text{major}) = 11.91$  min.  $t_r(\text{minor}) = 8.73$  min.  $[\alpha]_{\text{D}}^{25} = -1.65$  (c = 0.48,  $\text{CHCl}_3$ ).

**(R)-2-((4-chlorophenyl)thio)-3-phenylpropan-1-ol (5h)**



Signal 1: DAD1 B, Sig=254,16 Ref=360,100

| Peak # | RetTime [min] | Type | Width [min] | Area [mAU*s] | Height [mAU] | Area %  |
|--------|---------------|------|-------------|--------------|--------------|---------|
| 1      | 8.234         | BB   | 0.5570      | 1.47191e4    | 379.06180    | 55.2455 |
| 2      | 13.185        | BB   | 1.2337      | 1.19240e4    | 144.65845    | 44.7545 |



Signal 1: DAD1 B, Sig=254,16 Ref=360,100

| Peak # | RetTime [min] | Type | Width [min] | Area [mAU*s] | Height [mAU] | Area %  |
|--------|---------------|------|-------------|--------------|--------------|---------|
| 1      | 8.290         | BB   | 0.3287      | 356.39877    | 14.60463     | 5.9347  |
| 2      | 13.242        | BB   | 1.0629      | 5648.93652   | 76.73497     | 94.0653 |

The enantiomeric excess (88% *ee*) was determined by HPLC with a *Diacel* Chiralpak IA column (EtOAc/hexane = 1:4, 38 bar, flow rate: 1.0 mL/min,  $\lambda_{\max}$  = 254 nm):  $t_r$ (major) = 13.24 min.  $t_r$ (minor) = 8.29 min.  $[\alpha]_D^{24}$  = 16.64 (c = 0.22, CHCl<sub>3</sub>).

**(R)-2-((4-bromophenyl)thio)-3-phenylpropan-1-ol (5i)**



Signal 4: DAD1 A, Sig=254,4 Ref=360,100

| Peak # | RetTime [min] | Type | Width [min] | Area [mAU*s] | Height [mAU] | Area %  |
|--------|---------------|------|-------------|--------------|--------------|---------|
| 1      | 13.015        | BB   | 0.4313      | 2618.16675   | 86.45826     | 51.2571 |
| 2      | 16.335        | BB   | 0.7533      | 2489.74854   | 49.29337     | 48.7429 |



Signal 4: DAD1 A, Sig=254,4 Ref=360,100

| Peak # | RetTime [min] | Type | Width [min] | Area [mAU*s] | Height [mAU] | Area %  |
|--------|---------------|------|-------------|--------------|--------------|---------|
| 1      | 12.916        | BB   | 0.5347      | 5119.92627   | 143.33904    | 13.1801 |
| 2      | 15.446        | BB   | 1.1384      | 3.37259e4    | 437.95230    | 86.8199 |

The enantiomeric excess (74% *ee*) was determined by HPLC with a *Diacel* Chiralpak IA column (*i*-PrOH/Hexane = 1:19, 38 bar, flow rate: 1.0 mL/min,  $\lambda_{\text{max}}$  = 254 nm):  $t_r(\text{major})$  = 15.45 min.  $t_r(\text{minor})$  = 12.92 min.  $[\alpha]_D^{24}$  = -5.83 ( $c$  = 2.13,  $\text{CHCl}_3$ ).

**(R)-2-((3,5-bis(trifluoromethyl)phenyl)thio)-3-phenylpropan-1-ol (5j)**



Signal 1: DAD1 B, Sig=254,16 Ref=360,100

| Peak # | RetTime [min] | Type | Width [min] | Area [mAU*s] | Height [mAU] | Area %  |
|--------|---------------|------|-------------|--------------|--------------|---------|
| 1      | 6.379         | BV   | 0.1149      | 797.84601    | 107.06569    | 49.7455 |
| 2      | 6.696         | VB   | 0.1211      | 806.01068    | 103.23490    | 50.2545 |



Signal 1: DAD1 B, Sig=254,16 Ref=360,100

| Peak # | RetTime [min] | Type | Width [min] | Area [mAU*s] | Height [mAU] | Area %  |
|--------|---------------|------|-------------|--------------|--------------|---------|
| 1      | 6.368         | BV   | 0.1278      | 6066.08691   | 738.88824    | 80.4356 |
| 2      | 6.670         | VV   | 0.1216      | 1475.45398   | 187.82895    | 19.5644 |

The enantiomeric excess (61% *ee*) was determined by HPLC with a *Diacel* Chiralpak IC column (EtOH/hexane = 1:99, 41bar, flow rate: 1.0 mL/min,  $\lambda_{\max}$  = 254nm):  $t_r(\text{major})$  = 6.34 min.  $t_r(\text{minor})$  = 6.67 min.  $[\alpha]_D^{25} = -7.92$  (c = 0.96, CHCl<sub>3</sub>).

**(R)-3-phenyl-2-(propylthio)propan-1-ol (5k)**



Signal 1: DAD1 B, Sig=254,16 Ref=360,100

| Peak # | RetTime [min] | Type | Width [min] | Area [mAU*s] | Height [mAU] | Area %  |
|--------|---------------|------|-------------|--------------|--------------|---------|
| 1      | 10.888        | MM   | 0.1905      | 108.47723    | 9.49105      | 49.9953 |
| 2      | 11.798        | BB   | 0.1977      | 108.49770    | 8.57241      | 50.0047 |



Signal 1: DAD1 B, Sig=254,16 Ref=360,100

| Peak # | RetTime [min] | Type | Width [min] | Area [mAU*s] | Height [mAU] | Area %   |
|--------|---------------|------|-------------|--------------|--------------|----------|
| 1      | 11.772        | BB   | 0.2080      | 477.98386    | 35.75068     | 100.0000 |

The enantiomeric excess (enantiopure, >99% *ee*) was determined by HPLC with a *Diacel* Chiralpak IA column (EtOH /hexane = 1:99, 39 bar, flow rate: 1.0 mL/min,  $\lambda_{\max}$  = 254 nm):  $t_r(\text{major})$  = 11.77 min.  $t_r(\text{minor})$  = 10.88 min.  $[\alpha]_D^{25}$  = 15.70 ( $c$  = 0.47,  $\text{CHCl}_3$ ).

**(R)-2-(phenethylthio)-3-phenylpropan-1-ol (5l)**



Signal 1: DAD1 B, Sig=254,16 Ref=360,100

| Peak # | RetTime [min] | Type | Width [min] | Area [mAU*s] | Height [mAU] | Area %  |
|--------|---------------|------|-------------|--------------|--------------|---------|
| 1      | 16.696        | BV   | 0.3006      | 831.88348    | 43.20303     | 51.5924 |
| 2      | 17.567        | VB   | 0.3125      | 780.53119    | 38.82551     | 48.4076 |



Signal 1: DAD1 B, Sig=254,16 Ref=360,100

| Peak # | RetTime [min] | Type | Width [min] | Area [mAU*s] | Height [mAU] | Area %  |
|--------|---------------|------|-------------|--------------|--------------|---------|
| 1      | 16.409        | MM   | 0.3115      | 504.97800    | 27.02240     | 95.4530 |
| 2      | 17.188        | MM   | 0.2940      | 24.05515     | 1.36358      | 4.5470  |

The enantiomeric excess (91% *ee*) was determined by HPLC with a *Diacel* Chiralpak IA column (EtOH/hexane = 1:99, 39 bar, flow rate: 1.0 mL/min,  $\lambda_{\text{max}} = 254$  nm):  $t_r(\text{major}) = 16.41$  min.  $t_r(\text{minor}) = 17.19$  min.  $[\alpha]_D^{25} = 11.44$  ( $c = 0.32$ ,  $\text{CHCl}_3$ ).

**(R)-3-phenyl-2-(thiophen-2-ylthio)propan-1-ol (5m)**



Signal 1: DAD1 B, Sig=254,16 Ref=360,100

| Peak # | RetTime [min] | Type | Width [min] | Area [mAU*s] | Height [mAU] | Area %  |
|--------|---------------|------|-------------|--------------|--------------|---------|
| 1      | 16.217        | BB   | 0.7303      | 4105.50830   | 73.20249     | 55.3668 |
| 2      | 19.516        | BBA  | 0.7897      | 3309.60156   | 49.77993     | 44.6332 |



Signal 1: DAD1 B, Sig=254,16 Ref=360,100

| Peak # | RetTime [min] | Type | Width [min] | Area [mAU*s] | Height [mAU] | Area %  |
|--------|---------------|------|-------------|--------------|--------------|---------|
| 1      | 16.180        | VB   | 0.7351      | 4018.52246   | 71.56213     | 94.5654 |
| 2      | 19.510        | BV   | 0.6034      | 230.93935    | 4.52501      | 5.4346  |

The enantiomeric excess (89% *ee*) was determined by HPLC with a *Diacel* Chiralpak IA column (*i*-PrOH/hexane = 3:97, 44 bar, flow rate: 1.0 mL/min,  $\lambda_{\max}$  = 254 nm):  $t_r$ (major) = 16.18 min.  $t_r$ (minor) = 19.51 min.  $[\alpha]_D^{24}$  = 4.4 ( $c$  = 0.25, CHCl<sub>3</sub>).

**(R)-3-(4-methoxyphenyl)-2-(p-tolylthio)propan-1-ol (5n)**



Signal 3: DAD1 E, Sig=270,16 Ref=360,100

| Peak # | RetTime [min] | Type | Width [min] | Area [mAU*s] | Height [mAU] | Area %  |
|--------|---------------|------|-------------|--------------|--------------|---------|
| 1      | 13.708        | BV   | 0.7893      | 5027.93652   | 91.75758     | 49.6252 |
| 2      | 15.883        | VB   | 0.9985      | 5103.87500   | 65.53909     | 50.3748 |



Signal 3: DAD1 E, Sig=270,16 Ref=360,100

| Peak # | RetTime [min] | Type | Width [min] | Area [mAU*s] | Height [mAU] | Area %  |
|--------|---------------|------|-------------|--------------|--------------|---------|
| 1      | 13.742        | BV   | 0.6644      | 2343.74390   | 48.79516     | 25.1247 |
| 2      | 15.705        | VB   | 1.0750      | 6984.69287   | 86.97117     | 74.8753 |

The enantiomeric excess (50% *ee*) was determined by HPLC with a *Diacel Chiralpak IA* column (EtOAc/hexane = 20:80, 40 bar, flow rate: 1.0 mL/min,  $\lambda_{\text{max}}$  = 270 nm):  $t_r(\text{major})$  = 15.71 min.  $t_r(\text{minor})$  = 13.74 min.  $[\alpha]_{\text{D}}^{24}$  = -2.59 (c = 0.99, CHCl<sub>3</sub>).

**(R)-3-(4-chlorophenyl)-2-(p-tolylthio)propan-1-ol (5o)**



Signal 1: DAD1 B, Sig=254,16 Ref=360,100

| Peak # | RetTime [min] | Type | Width [min] | Area [mAU*s] | Height [mAU] | Area %  |
|--------|---------------|------|-------------|--------------|--------------|---------|
| 1      | 5.832         | VV   | 0.3345      | 1.16017e4    | 489.43491    | 50.3442 |
| 2      | 7.712         | VV   | 0.5212      | 1.14430e4    | 318.49640    | 49.6558 |



Signal 1: DAD1 B, Sig=254,16 Ref=360,100

| Peak # | RetTime [min] | Type | Width [min] | Area [mAU*s] | Height [mAU] | Area %  |
|--------|---------------|------|-------------|--------------|--------------|---------|
| 1      | 5.885         | VV   | 0.2495      | 778.11145    | 42.92582     | 12.0918 |
| 2      | 7.769         | VV   | 0.4448      | 5656.90283   | 177.02760    | 87.9082 |

The enantiomeric excess (76% *ee*) was determined by HPLC with a *Diacel* Chiralpak IA column (Ethyl acetate/hexane = 30:70, 41 bar, flow rate: 1.0 mL/min,  $\lambda_{\max}$  = 254 nm):  $t_r(\text{major})$  = 7.77 min.  $t_r(\text{minor})$  = 5.885 min.  $[\alpha]_D^{23}$  = -5.2 ( $c$  = 0.74,  $\text{CHCl}_3$ ).

**(R)-3-(4-bromophenyl)-2-(p-tolylthio)propan-1-ol (5p)**



Signal 3: DAD1 E, Sig=270,16 Ref=360,100

| Peak # | RetTime [min] | Type | Width [min] | Area [mAU*s] | Height [mAU] | Area %  |
|--------|---------------|------|-------------|--------------|--------------|---------|
| 1      | 5.958         | VB   | 0.3087      | 8536.28320   | 400.49347    | 49.3065 |
| 2      | 9.030         | BB   | 0.7030      | 8776.42480   | 182.50995    | 50.6935 |



Signal 3: DAD1 E, Sig=270,16 Ref=360,100

| Peak # | RetTime [min] | Type | Width [min] | Area [mAU*s] | Height [mAU] | Area %  |
|--------|---------------|------|-------------|--------------|--------------|---------|
| 1      | 6.051         | BB   | 0.2794      | 1690.26074   | 87.49695     | 34.2521 |
| 2      | 9.208         | BB   | 0.6074      | 3244.50049   | 75.79432     | 65.7479 |

The enantiomeric excess (31% *ee*) was determined by HPLC with a *Diacel* Chiralpak IA column (Ethyl acetate/hexane = 30:70, 41 bar, flow rate: 1.0 mL/min,  $\lambda_{\max}$  = 270 nm):  $t_r$ (major) = 9.21 min.  $t_r$ (minor) = 6.05 min.  $[\alpha]_D^{25}$  = -11 (c = 0.21, CHCl<sub>3</sub>).

**(R)-2-(p-tolylthio)butan-1-ol (5q)**



Signal 4: DAD1 A, Sig=254,4 Ref=360,100

| Peak # | RetTime [min] | Type | Width [min] | Area [mAU*s] | Height [mAU] | Area %  |
|--------|---------------|------|-------------|--------------|--------------|---------|
| 1      | 13.260        | BV   | 0.3388      | 4716.69385   | 211.01440    | 55.2938 |
| 2      | 14.389        | VB   | 0.4335      | 3813.54565   | 131.04892    | 44.7062 |



Signal 1: DAD1 B, Sig=254,4 Ref=360,100

| Peak # | RetTime [min] | Type | Width [min] | Area [mAU*s] | Height [mAU] | Area %  |
|--------|---------------|------|-------------|--------------|--------------|---------|
| 1      | 14.025        | VV   | 0.3033      | 1280.03809   | 62.93102     | 14.3887 |
| 2      | 14.698        | VB   | 0.5159      | 7616.09229   | 203.81885    | 85.6113 |

The enantiomeric excess (71% *ee*) was determined by HPLC with a *Diacel* Chiralpak IA column (*i*-PrOH/hexane = 1:49, 40 bar, flow rate: 1.0 mL/min,  $\lambda_{\text{max}} = 254$  nm):  $t_r(\text{major}) = 14.70$  min.  $t_r(\text{minor}) = 14.03$  min.  $[\alpha]_D^{25} = 40.47$  (c = 0.3, CHCl<sub>3</sub>).

**(R)-2-(p-tolylthio)pentan-1-ol (5r)**



Signal 4: DAD1 A, Sig=254,4 Ref=360,100

| Peak # | RetTime [min] | Type | Width [min] | Area [mAU*s] | Height [mAU] | Area %  |
|--------|---------------|------|-------------|--------------|--------------|---------|
| 1      | 12.162        | BV   | 0.3745      | 9231.09570   | 373.31946    | 46.9662 |
| 2      | 13.128        | VB   | 0.3776      | 1.04237e4    | 414.15805    | 53.0338 |



Signal 4: DAD1 A, Sig=254,4 Ref=360,100

| Peak # | RetTime [min] | Type | Width [min] | Area [mAU*s] | Height [mAU] | Area %  |
|--------|---------------|------|-------------|--------------|--------------|---------|
| 1      | 12.097        | BV   | 0.3985      | 1.41784e4    | 529.27753    | 92.1055 |
| 2      | 13.186        | VB   | 0.3680      | 1215.24854   | 47.57344     | 7.8945  |

The enantiomeric excess (84% *ee*) was determined by HPLC with a *Diacel* Chiralpak IA column (*i*-PrOH/hexane = 1:48, 37 bar, flow rate: 1.0 mL/min,  $\lambda_{\max}$  = 254 nm):  $t_r(\text{major})$  = 12.10 min.  $t_r(\text{minor})$  = 13.19 min.  $[\alpha]_D^{25}$  = 11.26 ( $c$  = 0.68, CHCl<sub>3</sub>).

**(R)-2-cyclohexyl-2-(p-tolylthio)ethan-1-ol (5s)**



Signal 1: DAD1 B, Sig=254,4 Ref=360,100

| Peak # | RetTime [min] | Type | Width [min] | Area [mAU*s] | Height [mAU] | Area %  |
|--------|---------------|------|-------------|--------------|--------------|---------|
| 1      | 7.502         | BB   | 0.1363      | 7490.31934   | 854.62170    | 51.8691 |
| 2      | 8.143         | BB   | 0.1499      | 6950.48535   | 724.77179    | 48.1309 |



Signal 1: DAD1 B, Sig=254,4 Ref=360,100

| Peak # | RetTime [min] | Type | Width [min] | Area [mAU*s] | Height [mAU] | Area %  |
|--------|---------------|------|-------------|--------------|--------------|---------|
| 1      | 7.426         | VV   | 0.1373      | 1218.27478   | 132.46622    | 7.4758  |
| 2      | 8.001         | VB   | 0.1691      | 1.50780e4    | 1429.36658   | 92.5242 |

The enantiomeric excess (85% ee) was determined by HPLC with a *Diacel Chiralpak IA* column (*i*-PrOH/hexane = 1:19, 39 bar, flow rate: 0.8 mL/min,  $\lambda_{\max}$  = 254 nm):  $t_r(\text{major})$  = 8.00 min.  $t_r(\text{minor})$  = 7.43 min.  $[\alpha]_D^{25}$  = -18.31 (c = 0.46, CHCl<sub>3</sub>).

**(R)-3-cyclohexyl-2-(p-tolylthio)propan-1-ol (5t)**



Signal 1: DAD1 B, Sig=254,16 Ref=360,100

| Peak # | RetTime [min] | Type | Width [min] | Area [mAU*s] | Height [mAU] | Area %  |
|--------|---------------|------|-------------|--------------|--------------|---------|
| 1      | 10.150        | BV   | 0.1780      | 1781.37390   | 155.10416    | 51.6714 |
| 2      | 10.626        | VB   | 0.1879      | 1666.12903   | 137.02281    | 48.3286 |



Signal 1: DAD1 B, Sig=254,16 Ref=360,100

| Peak # | RetTime [min] | Type | Width [min] | Area [mAU*s] | Height [mAU] | Area %  |
|--------|---------------|------|-------------|--------------|--------------|---------|
| 1      | 10.101        | BV   | 0.1788      | 337.26382    | 29.17948     | 8.1406  |
| 2      | 10.567        | VB   | 0.1869      | 3805.70312   | 319.71750    | 91.8594 |

The enantiomeric excess (84% *ee*) was determined by HPLC with a *Diacel* Chiralpak IA column (EtOH/hexane = 1:99, 39 bar, flow rate: 1.0 mL/min,  $\lambda_{\max}$  = 254 nm):  $t_r$ (major) = 10.57 min.  $t_r$ (minor) = 10.10 min.  $[\alpha]_D^{25}$  = 2.18 (c = 0.45, CHCl<sub>3</sub>).

**(R)-5-phenyl-2-(p-tolylthio)pentan-1-ol (5u)**



Signal 1: DAD1 B, Sig=254,16 Ref=360,100

| Peak # | RetTime [min] | Type | Width [min] | Area [mAU*s] | Height [mAU] | Area %  |
|--------|---------------|------|-------------|--------------|--------------|---------|
| 1      | 4.819         | BV   | 0.1865      | 2241.29297   | 158.94128    | 43.0258 |
| 2      | 5.529         | VV   | 0.2676      | 2967.88525   | 148.25380    | 56.9742 |



Signal 1: DAD1 B, Sig=254,16 Ref=360,100

| Peak # | RetTime [min] | Type | Width [min] | Area [mAU*s] | Height [mAU] | Area %  |
|--------|---------------|------|-------------|--------------|--------------|---------|
| 1      | 4.827         | MM   | 0.2077      | 226.88287    | 18.20689     | 15.0689 |
| 2      | 5.542         | MM   | 0.2732      | 1278.75061   | 78.00809     | 84.9311 |

The enantiomeric excess (70% *ee*) was determined by HPLC with a *Diacel* Chiralpak IA column (EtOAc/hexane = 1:4, 36 bar, flow rate: 1.0 mL/min,  $\lambda_{\max}$  = 254 nm):  $t_r(\text{major})$  = 5.54 min.  $t_r(\text{minor})$  = 4.83 min.  $[\alpha]_D^{25}$  = 1.33 ( $c$  = 0.45,  $\text{CHCl}_3$ ).

**(R)-2-(p-tolylthio)pent-4-en-1-ol (5v)**



Signal 1: DAD1 B, Sig=254,16 Ref=360,100

| Peak # | RetTime [min] | Type | Width [min] | Area [mAU*s] | Height [mAU] | Area %  |
|--------|---------------|------|-------------|--------------|--------------|---------|
| 1      | 12.534        | BV   | 0.2147      | 5887.85205   | 427.40906    | 50.4962 |
| 2      | 13.069        | VB   | 0.2202      | 5772.14160   | 405.19745    | 49.5038 |



Signal 1: DAD1 B, Sig=254,16 Ref=360,100

| Peak # | RetTime [min] | Type | Width [min] | Area [mAU*s] | Height [mAU] | Area %  |
|--------|---------------|------|-------------|--------------|--------------|---------|
| 1      | 12.723        | BV   | 0.2191      | 3018.86816   | 215.98494    | 23.1118 |
| 2      | 13.259        | VB   | 0.2280      | 1.00432e4    | 689.30786    | 76.8882 |

The enantiomeric excess (53% *ee*) was determined by HPLC with a *Diacel* Chiralpak IA column (EtOH/hexane = 1:99, 39 bar, flow rate: 1.0 mL/min,  $\lambda_{\max}$  = 254 nm):  $t_r$ (major) = 13.26 min.  $t_r$ (minor) = 12.72 min.  $[\alpha]_D^{25}$  = 3.14 (c = 0.18, CHCl<sub>3</sub>).

**(R)-2-(p-tolylthio)hex-4-yn-1-ol (5w)**



Signal 1: DAD1 B, Sig=254,4 Ref=360,100

| Peak # | RetTime [min] | Type | Width [min] | Area [mAU*s] | Height [mAU] | Area %  |
|--------|---------------|------|-------------|--------------|--------------|---------|
| 1      | 25.491        | BV   | 0.5669      | 1840.78528   | 44.84558     | 48.6276 |
| 2      | 26.986        | VB   | 0.6180      | 1944.69092   | 40.95383     | 51.3724 |



Signal 1: DAD1 B, Sig=254,4 Ref=360,100

| Peak # | RetTime [min] | Type | Width [min] | Area [mAU*s] | Height [mAU] | Area %  |
|--------|---------------|------|-------------|--------------|--------------|---------|
| 1      | 25.310        | BV   | 0.6541      | 5910.39697   | 129.09543    | 69.2105 |
| 2      | 26.970        | VB   | 0.6846      | 2629.34766   | 52.29364     | 30.7895 |

The enantiomeric excess (38% *ee*) was determined by HPLC with a *Diacel Chiralpak IA* column (*i*-PrOH/hexane = 1:66, 39 bar, flow rate: 0.8 mL/min,  $\lambda_{\text{max}} = 254$  nm):  $t_r(\text{major}) = 25.31$  min.  $t_r(\text{minor}) = 26.97$  min.  $[\alpha]_D^{25} = 0.24$  ( $c = 0.38$ ,  $\text{CHCl}_3$ ).

***tert*-butyl (*R*)-4-(2-oxo-1-(*p*-tolylthio)ethyl)piperidine-1-carboxylate (4x)**



Signal 1: DAD1 B, Sig=254,16 Ref=360,100

| Peak # | RetTime [min] | Type | Width [min] | Area [mAU*s] | Height [mAU] | Area %  |
|--------|---------------|------|-------------|--------------|--------------|---------|
| 1      | 8.029         | BB   | 0.2672      | 787.09473    | 41.51318     | 49.8923 |
| 2      | 9.126         | BB   | 0.3635      | 790.49268    | 31.41918     | 50.1077 |



Signal 1: DAD1 B, Sig=254,16 Ref=360,100

| Peak # | RetTime [min] | Type | Width [min] | Area [mAU*s] | Height [mAU] | Area %  |
|--------|---------------|------|-------------|--------------|--------------|---------|
| 1      | 7.993         | VV   | 0.2916      | 9486.58984   | 458.11786    | 85.5397 |
| 2      | 9.140         | VB   | 0.3766      | 1603.69019   | 61.01978     | 14.4603 |

The enantiomeric excess (71% *ee*) was determined by HPLC with a *Diacel* Chiralpak IA column (*i*-PrOH/hexane = 1:97, 37 bar, flow rate: 1.0 mL/min,  $\lambda_{\text{max}} = 254$  nm):  $t_r(\text{major}) = 7.99$  min.  $t_r(\text{minor}) = 9.14$  min.  $[\alpha]_D^{25} = 13.34$  ( $c = 0.81$ ,  $\text{CHCl}_3$ ).

**(R)-2-cyclohexyl-2-(p-tolylthio)ethyl 3,5-dinitrobenzoate (6a)**



Signal 1: DAD1 B, Sig=254,16 Ref=360,100

| Peak # | RetTime [min] | Type | Width [min] | Area [mAU*s] | Height [mAU] | Area %  |
|--------|---------------|------|-------------|--------------|--------------|---------|
| 1      | 6.726         | VV   | 0.2165      | 1431.34229   | 90.52164     | 49.5113 |
| 2      | 7.260         | VV   | 0.2428      | 1459.59998   | 81.55550     | 50.4887 |



Signal 1: DAD1 B, Sig=254,16 Ref=360,100

| Peak # | RetTime [min] | Type | Width [min] | Area [mAU*s] | Height [mAU] | Area %  |
|--------|---------------|------|-------------|--------------|--------------|---------|
| 1      | 6.740         | VV   | 0.2324      | 6909.79150   | 406.33820    | 23.7404 |
| 2      | 7.252         | VV   | 0.2253      | 2.21959e4    | 1529.13855   | 76.2596 |

The enantiomeric excess (53% *ee*) was determined by HPLC with a *Diacel Chiralpak IA* column (EtOAc/hexane = 1:4, 39 bar, flow rate: 1.0 mL/min,  $\lambda_{\max}$  = 254 nm):  $t_r(\text{major})$  = 7.25 min.  $t_r(\text{minor})$  = 6.74 min.  $[\alpha]_D^{22}$  = -90.76 ( $c$  = 0.11,  $\text{CHCl}_3$ ).

**(2S, 3R)-4-phenyl-3-(p-tolylthio)butan-2-ol (6b)**



Signal 1: DAD1 B, Sig=254,16 Ref=360,100

| Peak # | RetTime [min] | Type | Width [min] | Area [mAU*s] | Height [mAU] | Area %  |
|--------|---------------|------|-------------|--------------|--------------|---------|
| 1      | 10.497        | BB   | 0.4913      | 707.26550    | 20.25642     | 8.2357  |
| 2      | 11.835        | BB   | 0.6017      | 4104.86816   | 91.45319     | 47.7988 |
| 3      | 15.787        | BB   | 0.8809      | 3775.66968   | 58.35501     | 43.9655 |



Signal 1: DAD1 B, Sig=254,16 Ref=360,100

| Peak # | RetTime [min] | Type | Width [min] | Area [mAU*s] | Height [mAU] | Area %  |
|--------|---------------|------|-------------|--------------|--------------|---------|
| 1      | 8.713         | MM   | 0.5356      | 163.59506    | 5.09035      | 1.8609  |
| 2      | 10.391        | BB   | 0.4402      | 503.89758    | 15.46395     | 5.7319  |
| 3      | 11.790        | BB   | 0.6640      | 7851.60205   | 160.14308    | 89.3135 |
| 4      | 16.021        | MM   | 0.7743      | 271.96866    | 5.85391      | 3.0937  |

The diastereomeric ratio (94:6) was determined by HPLC with a *Diacel* Chiralpak IA column (*i*-PrOH/hexane = 3:97, 38 bar, flow rate: 1.0 mL/min,  $\lambda_{\max}$  = 254 nm):  $t_r$ (major) = 11.79 min.  $t_r$ (minor) = 16.02 min.  $[\alpha]_D^{24}$  = -25.39 (c = 0.40, CHCl<sub>3</sub>).

**Ethyl (*R*, *E*)-5-phenyl-4-(*p*-tolylthio)pent-2-enoate (**6c**)**



Signal 1: DAD1 B, Sig=254,16 Ref=360,100

| Peak # | RetTime [min] | Type | Width [min] | Area [mAU*s] | Height [mAU] | Area %  |
|--------|---------------|------|-------------|--------------|--------------|---------|
| 1      | 7.110         | BV   | 0.1281      | 2696.32788   | 327.36337    | 49.8627 |
| 2      | 9.196         | BB   | 0.1693      | 2711.17285   | 248.37793    | 50.1373 |



Signal 1: DAD1 B, Sig=254,16 Ref=360,100

| Peak # | RetTime [min] | Type | Width [min] | Area [mAU*s] | Height [mAU] | Area %  |
|--------|---------------|------|-------------|--------------|--------------|---------|
| 1      | 7.135         | VB   | 0.1254      | 364.53772    | 44.58160     | 8.3888  |
| 2      | 9.237         | BB   | 0.1696      | 3981.00415   | 364.02560    | 91.6112 |

The enantiomeric excess (83% *ee*) was determined by HPLC with a *Diacel* Chiralpak IC column (EtOH/hexane = 1:99, 40 bar, flow rate: 1.0 mL/min,  $\lambda_{\max}$  = 254 nm):  $t_r(\text{major})$  = 9.24 min.  $t_r(\text{minor})$  = 7.14 min.  $[\alpha]_D^{24}$  = 48.28 ( $c$  = 0.86,  $\text{CHCl}_3$ ).
